# Supplementary material for: Protein corona of magnetic PEI/siRNA complex under the influence of a magnetic field improves transfection efficiencyviacomplement and coagulation cascades
Source: Royal Society of Chemistry journal article supplement (doi:10.1039/c9tb00746f), 2019-01-01
Supplement: c9tb00746f1.pdf [file c9tb00746f1.pdf]

## Supporting Information

**Protein corona of magnetic PEI /siRNA complex under the  
influence of magnetic fields improves transfection efficiency via  
complement and coagulation cascades**

*Peipei Jiang, Yue Zhu, Ke Kang, Bin Luo, Jing He\*, and Yao Wu\**

National Engineering Research Center for Biomaterials, Sichuan University,  
Chengdu, Sichuan 610064, P.R. China

Corresponding Author:

\*E-mail: [jinghe30@scu.edu.cn](mailto:jinghe30@scu.edu.cn)

\*E-mail: [wuyao@scu.edu.cn](mailto:wuyao@scu.edu.cn)

## Supporting Information

Table S1. The size and zeta potential data of SPIO and stPEI-SPIO.

| Sample     | Size (nm)  | Zeta potential (mV) |
|------------|------------|---------------------|
| SPIO       | 10.9±2.47  |                     |
| stPEI-SPIO | 115.6±5.33 | 54.7±0.46           |

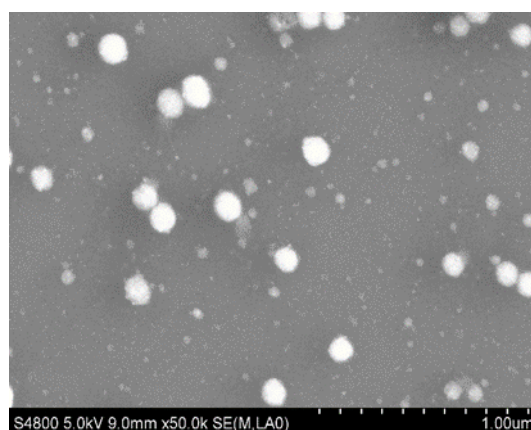

Fig. S1 SEM images of stPEI-SPIO.

Table S2. The size and zeta potential data of stPEI-SPIO/siRNA at different N/P ratios.

| N/P | Size(nm)    | Zeta potential (mV) |
|-----|-------------|---------------------|
| 1   | 127.5±12.59 | -27.0±2.76          |
| 5   | 145.3±7.10  | -24.2±0.95          |
| 10  | 205.0±13.34 | -20.0±1.05          |
| 20  | 167.3±12.52 | 37.2±1.25           |
| 40  | 114.3±7.13  | 38.5±1.74           |
| 50  | 105.0±6.02  | 43.3±1.68           |
| 60  | 72.6±4.97   | 46.4±1.15           |

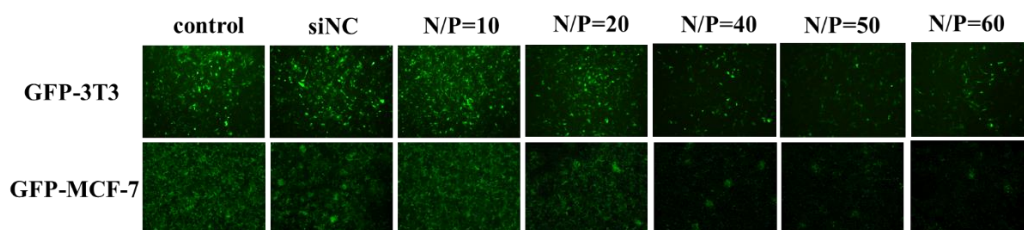

Fig. S2 Inverted fluorescence microscope images of GFP-3T3 cells and GFP-MCF-7 cells transfected with stPEI-SPIO/siRNA or siNC at different N/P ratios.

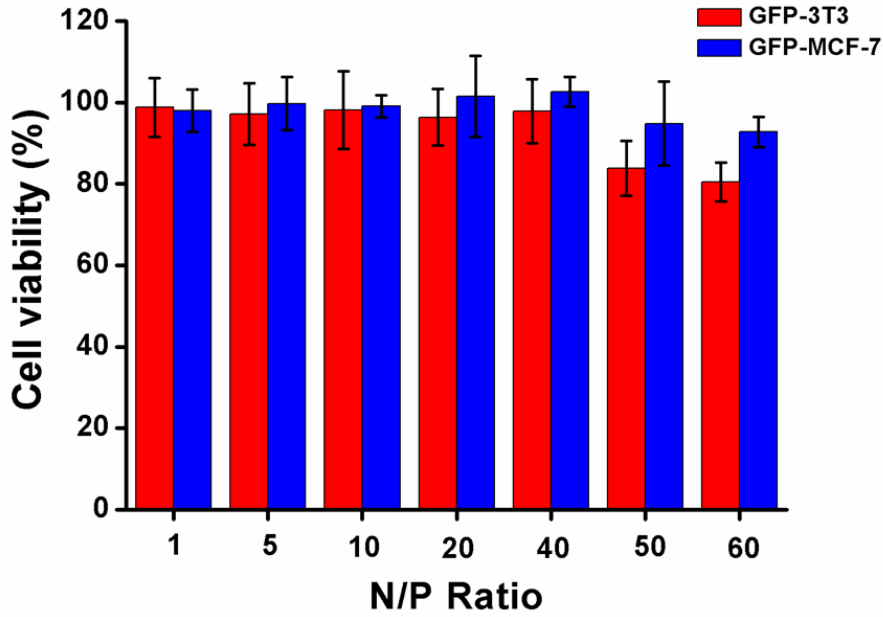

Fig.S3 Cell viabilities of GFP-3T3 cells and GFP-MCF-7 cells transfected with stPEI-SPIO/siRNA at different N/P ratios.

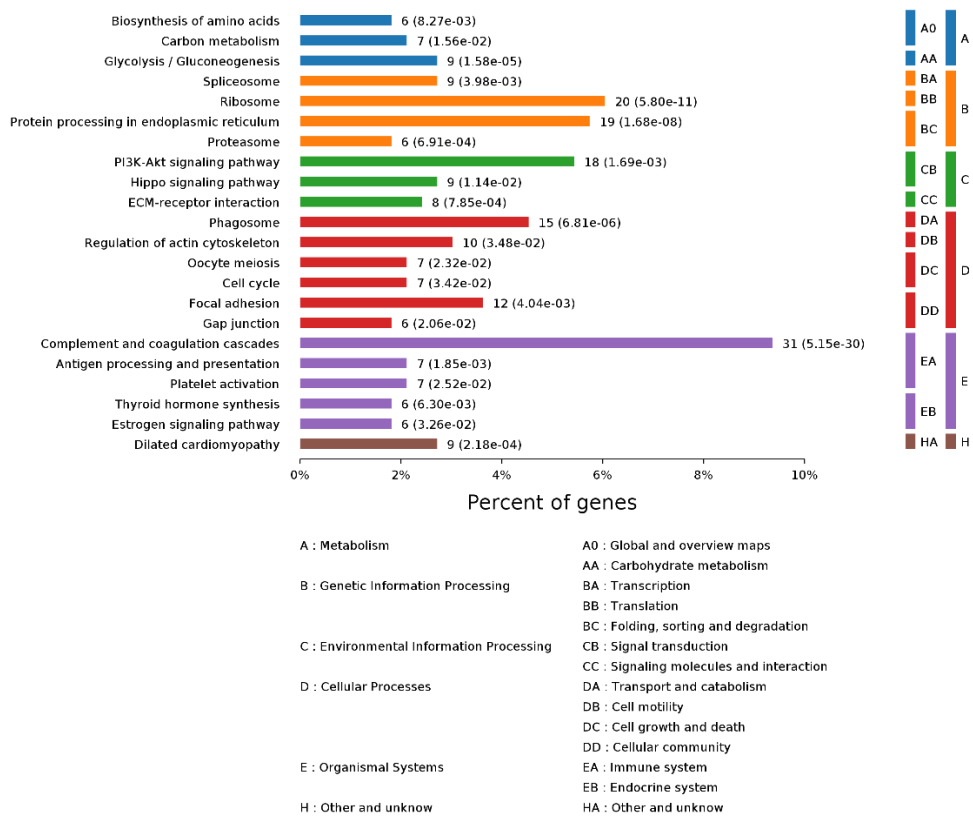

Fig.S4 KEGG pathway analysis of protein corona on the surface of nanocomplex transfected with GFP-3T3 cells under the influence of magnetic fields for 4 h.

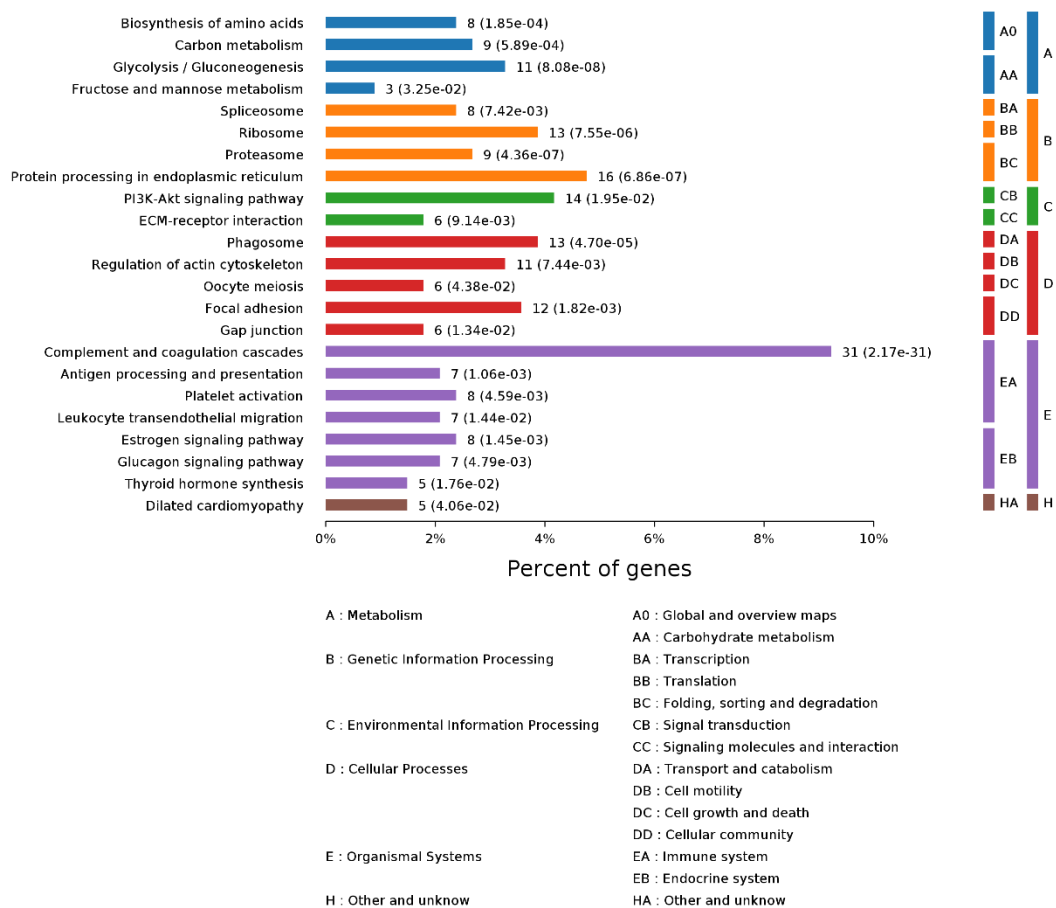

Fig.S5 KEGG pathway analysis of protein corona on the surface of nanocomplex transfected with GFP-MCF-7 cells under the influence of magnetic fields for 4 h.

Table S3. List of all detected proteins in the hard corona of 3T3-1,3T3-1MF,3T3-4,3T3-4MF.

| Protein IDs | 3T3-1 | 3T3-1MF | 3T3-4 | 3T3-4MF |
|-------------|-------|---------|-------|---------|
| V6F9A2      | 2.01% | 1.63%   | 2.04% | 2.09%   |
| P02081      | 1.56% | 1.50%   | 1.60% | 1.86%   |
| A0A140T897  | 1.26% | 1.28%   | 1.21% | 1.57%   |
| B0JYQ0      | 1.22% | 1.25%   | 1.18% | 1.53%   |
| P02070      | 1.07% | 1.08%   | 1.22% | 1.35%   |
| D4QBB3      | 1.00% | 0.97%   | 1.10% | 1.25%   |
| P04264      | 0.91% | 0.97%   | 0.93% | 1.15%   |
| F1N3Q7      | 0.88% | 0.79%   | 0.91% | 0.93%   |
| P01966      | 0.85% | 0.82%   | 0.90% | 1.11%   |
| G3X807      | 0.81% | 0.82%   | 0.89% | 1.09%   |

---

|                    |       |       |       |       |
|--------------------|-------|-------|-------|-------|
| P02754             | 0.81% | 0.72% | 0.93% | 1.01% |
| P42899             | 0.76% | 0.71% | 0.78% | 0.82% |
| Q03247             | 0.74% | 0.68% | 0.80% | 0.82% |
| P81644             | 0.74% | 0.59% | 0.52% | 0.50% |
| P13645             | 0.73% | 0.75% | 0.75% | 0.95% |
| P35908             | 0.73% | 0.78% | 0.80% | 0.96% |
| P02662             | 0.72% | 0.65% | 0.68% | 0.97% |
| P61603             | 0.70% | 0.82% | 0.83% | 0.80% |
| B5B0D4             | 0.65% | 0.57% | 0.78% | 0.80% |
| G3X6N3             | 0.64% | 0.68% | 0.59% | 0.88% |
| Q0IHK2             | 0.64% | 0.68% | 0.57% | 0.87% |
| P35527             | 0.60% | 0.70% | 0.71% | 0.80% |
| P34955             | 0.59% | 0.58% | 0.51% | 0.73% |
| Q5GN72             | 0.59% | 0.57% | 0.28% | 0.59% |
| E1BJK2             | 0.55% | 0.46% | 0.59% | 0.46% |
| E1BNR0             | 0.55% | 0.51% | 0.55% | 0.60% |
| G3X6Q8             | 0.55% | 0.40% | 0.57% | 0.30% |
| Q2KJD0             | 0.55% | 0.48% | 0.51% | 0.56% |
| P02533             | 0.54% | 0.66% | 0.62% | 0.63% |
| F1MYX2             | 0.53% | 0.45% | 0.55% | 0.49% |
| F1MSZ6             | 0.53% | 0.48% | 0.52% | 0.59% |
| Q2UVX4             | 0.52% | 0.53% | 0.44% | 0.58% |
| P00735             | 0.52% | 0.49% | 0.55% | 0.66% |
| P48616             | 0.52% | 0.60% | 0.61% | 0.73% |
| P02663             | 0.51% | 0.44% | 0.53% | 0.62% |
| Q28049             | 0.50% | 0.51% | 0.51% | 0.62% |
| V6F9A3             | 0.50% | 0.50% | 0.49% | 0.60% |
| Q3MHM5             | 0.49% | 0.43% | 0.52% | 0.48% |
| P17697             | 0.48% | 0.43% | 0.47% | 0.39% |
| Q3ZBS7             | 0.48% | 0.48% | 0.49% | 0.57% |
| Q7SIH1             | 0.48% | 0.48% | 0.51% | 0.52% |
| Q1RMK2             | 0.48% | 0.48% | 0.46% | 0.59% |
| K4JDR8             | 0.47% | 0.46% | 0.53% | 0.55% |
| P22226             | 0.47% | 0.37% | 0.44% | 0.18% |
| P63103             | 0.47% | 0.45% | 0.54% | 0.35% |
| G9HR27             | 0.45% | 0.19% | 0.21% | 0.21% |
| K4JF16             | 0.45% | 0.45% | 0.46% | 0.49% |
| ENSBTAP00000014147 | 0.45% | 0.46% | 0.50% | 0.54% |
| A6QNW7             | 0.45% | 0.43% | 0.44% | 0.53% |
| Q2KIW1             | 0.44% | 0.40% | 0.47% | 0.34% |
| ENSBTAP00000007350 | 0.44% | 0.42% | 0.43% | 0.37% |
| P02676             | 0.43% | 0.42% | 0.29% | 0.21% |
| P62261             | 0.42% | 0.39% | 0.42% | 0.27% |
| Q32S29             | 0.42% | 0.56% | 0.61% | 0.63% |

---

|                    |       |       |       |       |
|--------------------|-------|-------|-------|-------|
| Q3MHN5             | 0.42% | 0.42% | 0.27% | 0.45% |
| ENSBTAP00000024462 | 0.42% | 0.42% | 0.39% | 0.48% |
| Q76LV2             | 0.42% | 0.37% | 0.48% | 0.40% |
| P12763             | 0.41% | 0.43% | 0.46% | 0.56% |
| Q2KIH2             | 0.41% | 0.42% | 0.41% | 0.45% |
| P48668             | 0.41% | 0.59% | 0.55% | 0.56% |
| P02538             | 0.41% | 0.57% | 0.53% | 0.56% |
| O46375             | 0.41% | 0.42% | 0.37% | 0.30% |
| ENSBTAP00000038329 | 0.41% | 0.42% | 0.46% | 0.47% |
| Q76LV1             | 0.41% | 0.37% | 0.56% | 0.38% |
| Q2HJ86             | 0.41% | 0.39% | 0.43% | 0.46% |
| Q1RMN8             | 0.41% | 0.41% | 0.37% | 0.49% |
| Q3T101             | 0.41% | 0.41% | 0.37% | 0.49% |
| P00978             | 0.41% | 0.32% | 0.40% | 0.39% |
| P04259             | 0.40% | 0.59% | 0.55% | 0.55% |
| Q32L76             | 0.40% | 0.32% | 0.49% | 0.49% |
| Q9TS85             | 0.39% | 0.40% | 0.35% | 0.27% |
| P08779             | 0.39% | 0.53% | 0.38% | 0.41% |
| P01252             | 0.39% | 0.39% | 0.59% | 0.33% |
| P81948             | 0.39% | 0.39% | 0.44% | 0.50% |
| P13647             | 0.39% | 0.45% | 0.53% | 0.56% |
| P62157             | 0.39% | 0.28% | 0.46% | 0.00% |
| P60712             | 0.38% | 0.41% | 0.47% | 0.54% |
| F1N453             | 0.38% | 0.43% | 0.51% | 0.46% |
| Q7M365             | 0.38% | 0.38% | 0.42% | 0.51% |
| Q5E9Z2             | 0.38% | 0.37% | 0.36% | 0.38% |
| P28800             | 0.38% | 0.36% | 0.32% | 0.34% |
| G3X6E5             | 0.38% | 0.19% | 0.21% | 0.00% |
| O46738             | 0.37% | 0.12% | 0.17% | 0.17% |
| ENSBTAP00000024466 | 0.36% | 0.37% | 0.36% | 0.46% |
| O46739             | 0.36% | 0.18% | 0.30% | 0.12% |
| P00761             | 0.36% | 0.39% | 0.40% | 0.56% |
| ENSBTAP00000018574 | 0.35% | 0.33% | 0.33% | 0.38% |
| Q1RMN9             | 0.35% | 0.38% | 0.33% | 0.44% |
| Q5E9I6             | 0.34% | 0.35% | 0.25% | 0.27% |
| P02668             | 0.34% | 0.31% | 0.34% | 0.46% |
| Q9N2I2             | 0.34% | 0.32% | 0.29% | 0.25% |
| Q27967             | 0.33% | 0.31% | 0.28% | 0.24% |
| P10096             | 0.33% | 0.38% | 0.34% | 0.31% |
| F1MNW4             | 0.33% | 0.30% | 0.33% | 0.36% |
| A8YXZ2             | 0.33% | 0.21% | 0.26% | 0.13% |
| P00432             | 0.32% | 0.30% | 0.22% | 0.19% |
| P17690             | 0.32% | 0.31% | 0.32% | 0.27% |
| P55252             | 0.32% | 0.16% | 0.26% | 0.12% |

---

|            |       |       |       |       |
|------------|-------|-------|-------|-------|
| Q56K11     | 0.32% | 0.25% | 0.28% | 0.29% |
| P63048     | 0.32% | 0.36% | 0.40% | 0.38% |
| B8Y9S9     | 0.32% | 0.31% | 0.26% | 0.22% |
| Q3SZF2     | 0.32% | 0.29% | 0.22% | 0.27% |
| Q3Y5Z3     | 0.32% | 0.30% | 0.30% | 0.28% |
| P00829     | 0.31% | 0.30% | 0.29% | 0.37% |
| P60661     | 0.31% | 0.25% | 0.27% | 0.09% |
| P61223     | 0.31% | 0.23% | 0.34% | 0.38% |
| G1K1K0     | 0.31% | 0.23% | 0.09% | 0.00% |
| Q3T169     | 0.31% | 0.40% | 0.24% | 0.36% |
| P19483     | 0.31% | 0.32% | 0.31% | 0.37% |
| F1N3A1     | 0.31% | 0.12% | 0.22% | 0.07% |
| Q32PA1     | 0.30% | 0.31% | 0.29% | 0.35% |
| Q0VCX2     | 0.30% | 0.36% | 0.39% | 0.43% |
| Q28178     | 0.30% | 0.11% | 0.20% | 0.06% |
| Q28065     | 0.30% | 0.28% | 0.24% | 0.23% |
| P21809     | 0.30% | 0.19% | 0.17% | 0.17% |
| Q3SZI4     | 0.30% | 0.26% | 0.35% | 0.35% |
| Q3SYR8     | 0.30% | 0.30% | 0.33% | 0.40% |
| Q8MII4     | 0.30% | 0.00% | 0.00% | 0.00% |
| Q3ZBX9     | 0.29% | 0.34% | 0.37% | 0.51% |
| P68250     | 0.29% | 0.25% | 0.23% | 0.23% |
| A6QL81     | 0.29% | 0.09% | 0.07% | 0.06% |
| Q95140     | 0.29% | 0.31% | 0.32% | 0.35% |
| Q29RQ1     | 0.29% | 0.19% | 0.24% | 0.15% |
| P56652     | 0.28% | 0.25% | 0.25% | 0.26% |
| Q3ZBF7     | 0.28% | 0.22% | 0.31% | 0.26% |
| Q3SZ57     | 0.28% | 0.32% | 0.13% | 0.30% |
| Q3SZV7     | 0.28% | 0.30% | 0.16% | 0.26% |
| Q04695     | 0.28% | 0.36% | 0.32% | 0.35% |
| F1MUZ9     | 0.28% | 0.33% | 0.36% | 0.33% |
| Q862S8     | 0.28% | 0.24% | 0.40% | 0.27% |
| Q58D62     | 0.28% | 0.35% | 0.27% | 0.37% |
| Q3MHN2     | 0.28% | 0.27% | 0.28% | 0.31% |
| Q2TBR3     | 0.28% | 0.30% | 0.34% | 0.32% |
| Q9TTE1     | 0.27% | 0.27% | 0.18% | 0.29% |
| P61284     | 0.26% | 0.40% | 0.33% | 0.49% |
| Q5J801     | 0.26% | 0.33% | 0.22% | 0.39% |
| F1MKS5     | 0.26% | 0.25% | 0.18% | 0.16% |
| Q05443     | 0.26% | 0.20% | 0.22% | 0.16% |
| P02672     | 0.26% | 0.25% | 0.22% | 0.16% |
| Q3MHW2     | 0.25% | 0.36% | 0.19% | 0.33% |
| H6V5E5     | 0.25% | 0.09% | 0.23% | 0.10% |
| A0A0F6QMJ3 | 0.25% | 0.17% | 0.20% | 0.14% |

---



|                    |       |       |       |       |
|--------------------|-------|-------|-------|-------|
| ENSBTAP00000013050 | 0.25% | 0.17% | 0.16% | 0.08% |
| P01045             | 0.25% | 0.24% | 0.21% | 0.29% |
| P01044             | 0.25% | 0.23% | 0.22% | 0.28% |
| Q32KY0             | 0.25% | 0.25% | 0.24% | 0.30% |
| E1BPN4             | 0.25% | 0.22% | 0.20% | 0.16% |
| Q2KJF1             | 0.24% | 0.30% | 0.12% | 0.24% |
| P05787             | 0.24% | 0.23% | 0.28% | 0.36% |
| F1MX87             | 0.24% | 0.16% | 0.16% | 0.10% |
| XP_001252647       | 0.24% | 0.34% | 0.18% | 0.39% |
| Q3ZC07             | 0.24% | 0.26% | 0.26% | 0.30% |
| Q2KII3             | 0.24% | 0.24% | 0.22% | 0.27% |
| Q29RU4             | 0.24% | 0.14% | 0.22% | 0.15% |
| P05307             | 0.24% | 0.33% | 0.31% | 0.29% |
| P35445             | 0.24% | 0.09% | 0.13% | 0.09% |
| Q3SYW7             | 0.24% | 0.11% | 0.16% | 0.06% |
| O18979             | 0.24% | 0.17% | 0.21% | 0.12% |
| Q2TBQ5             | 0.24% | 0.26% | 0.26% | 0.21% |
| Q3SZH5             | 0.23% | 0.16% | 0.09% | 0.12% |
| P52193             | 0.23% | 0.21% | 0.19% | 0.17% |
| Q5E9F8             | 0.23% | 0.23% | 0.25% | 0.26% |
| A4FV54             | 0.22% | 0.15% | 0.16% | 0.17% |
| P68103             | 0.22% | 0.26% | 0.21% | 0.24% |
| Q4ZJS0             | 0.22% | 0.12% | 0.21% | 0.06% |
| P00744             | 0.22% | 0.12% | 0.21% | 0.17% |
| Q5EA67             | 0.21% | 0.23% | 0.21% | 0.24% |
| Q8SQH5             | 0.21% | 0.38% | 0.36% | 0.36% |
| Q862Q3             | 0.21% | 0.16% | 0.24% | 0.29% |
| Q3MHL4             | 0.21% | 0.25% | 0.31% | 0.30% |
| Q17QH1             | 0.21% | 0.18% | 0.23% | 0.19% |
| Q0VCM5             | 0.21% | 0.21% | 0.22% | 0.17% |
| P19858             | 0.21% | 0.20% | 0.18% | 0.20% |
| F1N401             | 0.21% | 0.14% | 0.18% | 0.13% |
| F1MYG5             | 0.21% | 0.34% | 0.32% | 0.28% |
| E1BI02             | 0.21% | 0.19% | 0.21% | 0.20% |
| Q3SWW8             | 0.21% | 0.22% | 0.19% | 0.29% |
| Q3SZ54             | 0.20% | 0.21% | 0.20% | 0.21% |
| F1MC75             | 0.20% | 0.08% | 0.21% | 0.06% |
| Q95M18             | 0.20% | 0.27% | 0.27% | 0.30% |
| Q3SZZ9             | 0.20% | 0.19% | 0.15% | 0.08% |
| Q9GL29             | 0.20% | 0.21% | 0.22% | 0.28% |
| K7QF89             | 0.20% | 0.13% | 0.18% | 0.10% |
| A2I7N1             | 0.20% | 0.18% | 0.15% | 0.21% |
| P35541             | 0.20% | 0.21% | 0.18% | 0.17% |
| ENSBTAP00000037665 | 0.20% | 0.18% | 0.11% | 0.11% |

---

|                    |       |       |       |       |
|--------------------|-------|-------|-------|-------|
| P04272             | 0.20% | 0.29% | 0.19% | 0.27% |
| P19427             | 0.20% | 0.15% | 0.19% | 0.13% |
| P07224             | 0.20% | 0.10% | 0.16% | 0.07% |
| A5PJT7             | 0.19% | 0.18% | 0.09% | 0.10% |
| Q28107             | 0.19% | 0.16% | 0.20% | 0.17% |
| P45879             | 0.19% | 0.27% | 0.23% | 0.18% |
| Q3SZP2             | 0.19% | 0.11% | 0.16% | 0.13% |
| A7E3W2             | 0.19% | 0.12% | 0.16% | 0.03% |
| Q3T004             | 0.19% | 0.24% | 0.21% | 0.25% |
| P68002             | 0.19% | 0.24% | 0.23% | 0.23% |
| F1N102             | 0.19% | 0.10% | 0.15% | 0.06% |
| F1MW44             | 0.19% | 0.21% | 0.14% | 0.13% |
| Q3T0D5             | 0.18% | 0.19% | 0.31% | 0.19% |
| Q2TBU0             | 0.18% | 0.12% | 0.15% | 0.12% |
| P00745             | 0.18% | 0.26% | 0.22% | 0.41% |
| Q1RMH5             | 0.18% | 0.12% | 0.11% | 0.11% |
| Q3SX14             | 0.18% | 0.20% | 0.18% | 0.22% |
| G8JKX6             | 0.18% | 0.16% | 0.17% | 0.14% |
| P00741             | 0.18% | 0.17% | 0.15% | 0.18% |
| Q29437             | 0.18% | 0.15% | 0.08% | 0.12% |
| P81287             | 0.18% | 0.15% | 0.18% | 0.18% |
| P02722             | 0.18% | 0.36% | 0.32% | 0.36% |
| O46415             | 0.18% | 0.09% | 0.07% | 0.00% |
| A0A077KSH2         | 0.18% | 0.18% | 0.19% | 0.16% |
| Q3T0P6             | 0.17% | 0.20% | 0.20% | 0.14% |
| P80195             | 0.17% | 0.21% | 0.23% | 0.28% |
| Q32L58             | 0.17% | 0.00% | 0.00% | 0.00% |
| Q30287             | 0.17% | 0.08% | 0.14% | 0.08% |
| A7Z057             | 0.17% | 0.13% | 0.18% | 0.11% |
| P51122             | 0.16% | 0.15% | 0.11% | 0.14% |
| E3SAZ8             | 0.16% | 0.15% | 0.18% | 0.20% |
| P04815             | 0.16% | 0.00% | 0.00% | 0.00% |
| A1XED1             | 0.16% | 0.16% | 0.18% | 0.27% |
| P08728             | 0.16% | 0.18% | 0.21% | 0.22% |
| Q5E9B1             | 0.16% | 0.15% | 0.14% | 0.13% |
| ENSBTAP00000016046 | 0.16% | 0.18% | 0.18% | 0.18% |
| Q5E9F7             | 0.16% | 0.35% | 0.18% | 0.13% |
| Q3T165             | 0.16% | 0.18% | 0.15% | 0.16% |
| P19120             | 0.16% | 0.24% | 0.19% | 0.22% |
| A6QLS9             | 0.16% | 0.16% | 0.09% | 0.18% |
| A6H767             | 0.16% | 0.14% | 0.17% | 0.18% |
| P23805             | 0.16% | 0.16% | 0.12% | 0.19% |
| Q2TBI0             | 0.15% | 0.10% | 0.11% | 0.15% |
| Q28017             | 0.15% | 0.10% | 0.17% | 0.10% |

---

---

|          |       |       |       |       |
|----------|-------|-------|-------|-------|
| A5D984   | 0.15% | 0.25% | 0.13% | 0.17% |
| Q5EA96   | 0.15% | 0.10% | 0.11% | 0.09% |
| F1MPH3   | 0.15% | 0.09% | 0.10% | 0.03% |
| A4IF97   | 0.15% | 0.12% | 0.13% | 0.00% |
| Q95114   | 0.15% | 0.13% | 0.15% | 0.15% |
| E2DI12   | 0.15% | 0.10% | 0.11% | 0.13% |
| A5D7L1   | 0.15% | 0.13% | 0.05% | 0.09% |
| F1N076   | 0.15% | 0.14% | 0.08% | 0.09% |
| O02717   | 0.15% | 0.12% | 0.10% | 0.02% |
| P80109   | 0.15% | 0.10% | 0.09% | 0.04% |
| P68509   | 0.15% | 0.06% | 0.09% | 0.06% |
| Q58DL9   | 0.15% | 0.10% | 0.13% | 0.06% |
| P02768-1 | 0.14% | 0.15% | 0.13% | 0.17% |
| A6QR15   | 0.14% | 0.07% | 0.14% | 0.10% |
| F1MD83   | 0.14% | 0.14% | 0.10% | 0.00% |
| P01267   | 0.14% | 0.08% | 0.09% | 0.03% |
| F1MDH3   | 0.14% | 0.11% | 0.11% | 0.08% |
| Q58DW0   | 0.14% | 0.15% | 0.14% | 0.13% |
| A6QLL8   | 0.13% | 0.17% | 0.08% | 0.12% |
| Q2KIV9   | 0.13% | 0.11% | 0.07% | 0.09% |
| Q24JY8   | 0.13% | 0.00% | 0.10% | 0.00% |
| Q3T0D7   | 0.13% | 0.11% | 0.12% | 0.11% |
| F1MM32   | 0.13% | 0.09% | 0.11% | 0.08% |
| F1MPE1   | 0.13% | 0.07% | 0.10% | 0.05% |
| Q3YJG7   | 0.13% | 0.07% | 0.08% | 0.08% |
| F1MTN1   | 0.13% | 0.06% | 0.13% | 0.06% |
| Q0VC36   | 0.13% | 0.09% | 0.09% | 0.09% |
| Q0QEV5   | 0.13% | 0.16% | 0.21% | 0.13% |
| A7MB04   | 0.13% | 0.09% | 0.14% | 0.09% |
| E1BMX5   | 0.13% | 0.09% | 0.07% | 0.03% |
| P02666   | 0.13% | 0.15% | 0.14% | 0.20% |
| Q9XSJ4   | 0.12% | 0.14% | 0.16% | 0.12% |
| Q9TS78   | 0.12% | 0.00% | 0.00% | 0.00% |
| A6QLB3   | 0.12% | 0.07% | 0.09% | 0.04% |
| F1N367   | 0.12% | 0.11% | 0.12% | 0.10% |
| A6QNL5   | 0.12% | 0.12% | 0.17% | 0.16% |
| Q5E9E6   | 0.12% | 0.17% | 0.16% | 0.00% |
| Q0QF29   | 0.12% | 0.18% | 0.17% | 0.16% |
| Q862N4   | 0.12% | 0.23% | 0.17% | 0.21% |
| P00171   | 0.12% | 0.12% | 0.13% | 0.10% |
| P41541   | 0.12% | 0.06% | 0.09% | 0.05% |
| E1BI98   | 0.11% | 0.09% | 0.07% | 0.08% |
| G9HQX2   | 0.11% | 0.11% | 0.13% | 0.00% |
| F1MND9   | 0.11% | 0.05% | 0.07% | 0.00% |

---

---

|        |       |       |       |       |
|--------|-------|-------|-------|-------|
| Q3T0L7 | 0.11% | 0.19% | 0.12% | 0.15% |
| F1MER7 | 0.11% | 0.09% | 0.10% | 0.06% |
| P02639 | 0.11% | 0.11% | 0.00% | 0.00% |
| P61356 | 0.11% | 0.23% | 0.29% | 0.25% |
| Q1LZ81 | 0.11% | 0.11% | 0.12% | 0.00% |
| Q1RMP3 | 0.11% | 0.00% | 0.00% | 0.00% |
| E1BLI9 | 0.11% | 0.11% | 0.00% | 0.00% |
| F1N169 | 0.11% | 0.09% | 0.07% | 0.05% |
| Q2KIW4 | 0.11% | 0.10% | 0.10% | 0.05% |
| Q3ZBG0 | 0.11% | 0.17% | 0.16% | 0.06% |
| Q3T149 | 0.11% | 0.00% | 0.09% | 0.00% |
| P60902 | 0.11% | 0.16% | 0.00% | 0.00% |
| A7Z066 | 0.10% | 0.11% | 0.09% | 0.13% |
| F1MQ37 | 0.10% | 0.09% | 0.09% | 0.04% |
| Q3YFG5 | 0.10% | 0.09% | 0.08% | 0.08% |
| P38657 | 0.10% | 0.15% | 0.14% | 0.15% |
| E1BJY4 | 0.10% | 0.05% | 0.09% | 0.05% |
| Q2KJH6 | 0.10% | 0.10% | 0.11% | 0.12% |
| Q3T0X5 | 0.10% | 0.18% | 0.18% | 0.08% |
| F6S1Q0 | 0.10% | 0.11% | 0.11% | 0.13% |
| F1MKG2 | 0.10% | 0.08% | 0.07% | 0.04% |
| Q862R3 | 0.10% | 0.13% | 0.21% | 0.00% |
| Q3T054 | 0.10% | 0.20% | 0.21% | 0.16% |
| Q3SZC0 | 0.10% | 0.15% | 0.11% | 0.20% |
| Q3ZCH0 | 0.10% | 0.28% | 0.27% | 0.31% |
| Q2TBX5 | 0.09% | 0.10% | 0.07% | 0.08% |
| Q2TA40 | 0.09% | 0.08% | 0.10% | 0.07% |
| Q3ZBT1 | 0.09% | 0.11% | 0.08% | 0.06% |
| Q3SYZ7 | 0.09% | 0.19% | 0.25% | 0.25% |
| Q08E54 | 0.09% | 0.08% | 0.07% | 0.06% |
| Q0P5D6 | 0.09% | 0.05% | 0.12% | 0.00% |
| P21793 | 0.09% | 0.06% | 0.07% | 0.04% |
| Q3ZBH8 | 0.09% | 0.13% | 0.15% | 0.12% |
| Q3T087 | 0.09% | 0.09% | 0.10% | 0.08% |
| P15781 | 0.09% | 0.09% | 0.10% | 0.06% |
| Q58DW5 | 0.09% | 0.09% | 0.06% | 0.09% |
| Q5E9F9 | 0.08% | 0.07% | 0.09% | 0.00% |
| F1MZ00 | 0.08% | 0.13% | 0.00% | 0.00% |
| Q0IJ2  | 0.08% | 0.00% | 0.06% | 0.00% |
| H2CNR1 | 0.08% | 0.11% | 0.00% | 0.11% |
| O77742 | 0.08% | 0.06% | 0.05% | 0.05% |
| P18902 | 0.08% | 0.08% | 0.00% | 0.08% |
| Q3B8S0 | 0.08% | 0.13% | 0.00% | 0.17% |
| P02253 | 0.08% | 0.17% | 0.15% | 0.19% |

---

---

|        |       |       |       |       |
|--------|-------|-------|-------|-------|
| A7YWC6 | 0.08% | 0.08% | 0.00% | 0.00% |
| E1BKS1 | 0.08% | 0.00% | 0.00% | 0.00% |
| Q2KJE5 | 0.08% | 0.08% | 0.08% | 0.07% |
| Q3SYR5 | 0.08% | 0.00% | 0.00% | 0.00% |
| Q9BGI3 | 0.08% | 0.00% | 0.00% | 0.00% |
| P08729 | 0.08% | 0.10% | 0.15% | 0.23% |
| Q3B7N2 | 0.08% | 0.11% | 0.03% | 0.05% |
| Q7YRW9 | 0.08% | 0.08% | 0.06% | 0.11% |
| Q9TTK6 | 0.08% | 0.05% | 0.03% | 0.06% |
| Q5U7H2 | 0.08% | 0.08% | 0.00% | 0.10% |
| G3MYH4 | 0.08% | 0.00% | 0.06% | 0.00% |
| G8JKV5 | 0.08% | 0.08% | 0.08% | 0.10% |
| Q58DS9 | 0.08% | 0.08% | 0.08% | 0.00% |
| F1MJQ1 | 0.08% | 0.08% | 0.08% | 0.07% |
| P22457 | 0.07% | 0.12% | 0.07% | 0.11% |
| E1BCW0 | 0.07% | 0.04% | 0.04% | 0.00% |
| Q5KR47 | 0.07% | 0.09% | 0.10% | 0.07% |
| Q5KR48 | 0.07% | 0.07% | 0.08% | 0.10% |
| A7E3S8 | 0.07% | 0.06% | 0.06% | 0.08% |
| P26779 | 0.07% | 0.03% | 0.04% | 0.03% |
| P10103 | 0.07% | 0.07% | 0.00% | 0.00% |
| Q2HJ97 | 0.07% | 0.14% | 0.08% | 0.14% |
| Q3KUS7 | 0.07% | 0.15% | 0.04% | 0.14% |
| Q5E9E3 | 0.07% | 0.05% | 0.00% | 0.00% |
| O77709 | 0.07% | 0.04% | 0.08% | 0.05% |
| Q56JX8 | 0.07% | 0.14% | 0.11% | 0.19% |
| Q3T0Q4 | 0.07% | 0.21% | 0.19% | 0.09% |
| A5D7D1 | 0.07% | 0.10% | 0.03% | 0.05% |
| Q5E987 | 0.07% | 0.07% | 0.07% | 0.09% |
| P79125 | 0.07% | 0.00% | 0.05% | 0.00% |
| Q5E956 | 0.07% | 0.27% | 0.07% | 0.09% |
| A7E350 | 0.07% | 0.08% | 0.03% | 0.06% |
| Q29RV1 | 0.07% | 0.04% | 0.04% | 0.03% |
| P62194 | 0.06% | 0.05% | 0.07% | 0.00% |
| Q95121 | 0.06% | 0.08% | 0.06% | 0.05% |
| Q3T0S6 | 0.06% | 0.06% | 0.14% | 0.14% |
| G3MZI7 | 0.06% | 0.05% | 0.05% | 0.03% |
| P05784 | 0.06% | 0.06% | 0.05% | 0.07% |
| A7YW37 | 0.06% | 0.00% | 0.02% | 0.00% |
| Q3T108 | 0.06% | 0.08% | 0.09% | 0.00% |
| E1BFV0 | 0.06% | 0.06% | 0.05% | 0.05% |
| Q2KIG3 | 0.06% | 0.07% | 0.08% | 0.08% |
| P49410 | 0.06% | 0.10% | 0.09% | 0.06% |
| F1N1G4 | 0.06% | 0.00% | 0.00% | 0.00% |

---

---

|        |       |       |       |       |
|--------|-------|-------|-------|-------|
| G3MYZ3 | 0.06% | 0.06% | 0.02% | 0.07% |
| Q29423 | 0.06% | 0.03% | 0.00% | 0.00% |
| P05059 | 0.06% | 0.06% | 0.04% | 0.06% |
| F1MPJ7 | 0.06% | 0.06% | 0.06% | 0.05% |
| Q27975 | 0.06% | 0.04% | 0.06% | 0.06% |
| Q3T0K2 | 0.06% | 0.02% | 0.00% | 0.00% |
| Q3T0B6 | 0.06% | 0.04% | 0.04% | 0.10% |
| F1N6W9 | 0.06% | 0.03% | 0.03% | 0.04% |
| Q2KIT0 | 0.06% | 0.14% | 0.06% | 0.15% |
| A6H7C4 | 0.06% | 0.09% | 0.06% | 0.12% |
| O18789 | 0.06% | 0.08% | 0.08% | 0.10% |
| Q5BIP9 | 0.06% | 0.06% | 0.06% | 0.08% |
| Q6LBN7 | 0.05% | 0.06% | 0.08% | 0.06% |
| Q28085 | 0.05% | 0.04% | 0.02% | 0.05% |
| Q3SX47 | 0.05% | 0.13% | 0.18% | 0.07% |
| Q0VC47 | 0.05% | 0.05% | 0.06% | 0.00% |
| P61585 | 0.05% | 0.00% | 0.06% | 0.00% |
| P26452 | 0.05% | 0.16% | 0.18% | 0.19% |
| Q2KIS7 | 0.05% | 0.16% | 0.09% | 0.11% |
| F1N2K1 | 0.05% | 0.04% | 0.07% | 0.06% |
| A5D9E9 | 0.05% | 0.01% | 0.00% | 0.02% |
| P33672 | 0.05% | 0.08% | 0.08% | 0.10% |
| Q7RTS7 | 0.05% | 0.06% | 0.08% | 0.06% |
| P81282 | 0.05% | 0.03% | 0.05% | 0.02% |
| Q3ZBG1 | 0.05% | 0.07% | 0.00% | 0.00% |
| Q86YZ3 | 0.05% | 0.06% | 0.07% | 0.07% |
| A7E3V7 | 0.05% | 0.05% | 0.05% | 0.04% |
| A6QNS6 | 0.05% | 0.04% | 0.03% | 0.02% |
| Q5E983 | 0.05% | 0.00% | 0.00% | 0.06% |
| Q5E971 | 0.05% | 0.05% | 0.05% | 0.00% |
| Q5E9A3 | 0.05% | 0.05% | 0.00% | 0.04% |
| O77834 | 0.05% | 0.12% | 0.00% | 0.06% |
| G3X8D7 | 0.05% | 0.07% | 0.00% | 0.00% |
| Q3T0D0 | 0.05% | 0.09% | 0.04% | 0.05% |
| Q2KIF2 | 0.05% | 0.08% | 0.00% | 0.08% |
| Q8SPF8 | 0.05% | 0.03% | 0.00% | 0.00% |
| A7MBA2 | 0.04% | 0.01% | 0.03% | 0.02% |
| G3N3E4 | 0.04% | 0.02% | 0.03% | 0.01% |
| F1MRZ8 | 0.04% | 0.04% | 0.03% | 0.00% |
| P12234 | 0.04% | 0.06% | 0.06% | 0.08% |
| Q5E9B7 | 0.04% | 0.04% | 0.07% | 0.06% |
| Q148H8 | 0.04% | 0.05% | 0.07% | 0.06% |
| Q32KL2 | 0.04% | 0.10% | 0.05% | 0.00% |
| Q3ZBW4 | 0.04% | 0.10% | 0.14% | 0.00% |

---

|        |       |       |       |       |
|--------|-------|-------|-------|-------|
| J9QCU0 | 0.04% | 0.04% | 0.00% | 0.04% |
| Q3ZCK9 | 0.04% | 0.10% | 0.07% | 0.00% |
| Q3ZCI9 | 0.04% | 0.05% | 0.05% | 0.03% |
| Q8HYW7 | 0.04% | 0.08% | 0.04% | 0.00% |
| Q28146 | 0.04% | 0.02% | 0.04% | 0.02% |
| Q9BGI2 | 0.04% | 0.10% | 0.13% | 0.13% |
| F1MUC5 | 0.04% | 0.02% | 0.01% | 0.01% |
| Q92764 | 0.04% | 0.04% | 0.04% | 0.05% |
| A6QR38 | 0.04% | 0.04% | 0.06% | 0.05% |
| Q3MHL3 | 0.04% | 0.05% | 0.04% | 0.00% |
| Q5E9D7 | 0.04% | 0.04% | 0.04% | 0.00% |
| Q3SZF3 | 0.04% | 0.08% | 0.07% | 0.06% |
| F1MKY3 | 0.04% | 0.02% | 0.04% | 0.00% |
| P56701 | 0.04% | 0.04% | 0.07% | 0.04% |
| A7MBG8 | 0.04% | 0.04% | 0.00% | 0.00% |
| Q1JPA2 | 0.04% | 0.07% | 0.14% | 0.08% |
| Q2TBU9 | 0.03% | 0.02% | 0.03% | 0.05% |
| P09867 | 0.03% | 0.21% | 0.06% | 0.09% |
| Q32PI4 | 0.03% | 0.03% | 0.03% | 0.02% |
| P63243 | 0.03% | 0.08% | 0.09% | 0.09% |
| P58352 | 0.03% | 0.03% | 0.06% | 0.03% |
| A5PJN2 | 0.03% | 0.07% | 0.06% | 0.06% |
| Q3T0K1 | 0.03% | 0.06% | 0.00% | 0.00% |
| Q3SYU2 | 0.03% | 0.07% | 0.03% | 0.03% |
| Q0VCX1 | 0.03% | 0.03% | 0.00% | 0.00% |
| Q3ZBH0 | 0.03% | 0.00% | 0.02% | 0.03% |
| Q28182 | 0.03% | 0.00% | 0.02% | 0.00% |
| A7MBJ5 | 0.03% | 0.03% | 0.02% | 0.01% |
| Q28034 | 0.03% | 0.05% | 0.03% | 0.04% |
| Q56JV6 | 0.03% | 0.04% | 0.05% | 0.04% |
| A6QP36 | 0.03% | 0.04% | 0.05% | 0.04% |
| G1K1R6 | 0.03% | 0.00% | 0.03% | 0.04% |
| F1ME65 | 0.03% | 0.03% | 0.03% | 0.02% |
| Q32PI5 | 0.03% | 0.03% | 0.02% | 0.02% |
| P23206 | 0.03% | 0.03% | 0.02% | 0.02% |
| Q5D862 | 0.03% | 0.03% | 0.03% | 0.02% |
| Q2HJ49 | 0.03% | 0.04% | 0.04% | 0.02% |
| Q2TBL2 | 0.03% | 0.04% | 0.00% | 0.00% |
| Q2NL22 | 0.03% | 0.03% | 0.03% | 0.03% |
| E1BB32 | 0.02% | 0.00% | 0.02% | 0.00% |
| Q1JP95 | 0.02% | 0.00% | 0.03% | 0.00% |
| F1N789 | 0.02% | 0.02% | 0.00% | 0.00% |
| E1BJ49 | 0.02% | 0.02% | 0.00% | 0.00% |
| E1BEL6 | 0.02% | 0.01% | 0.01% | 0.02% |

|        |       |       |       |       |
|--------|-------|-------|-------|-------|
| F1MHQ8 | 0.02% | 0.02% | 0.03% | 0.03% |
| P27674 | 0.02% | 0.03% | 0.02% | 0.00% |
| F1MVS9 | 0.02% | 0.00% | 0.02% | 0.00% |
| Q8SPJ1 | 0.02% | 0.03% | 0.02% | 0.00% |
| Q9XTA3 | 0.02% | 0.00% | 0.00% | 0.00% |
| Q0P5A6 | 0.02% | 0.00% | 0.03% | 0.00% |
| Q2T9X2 | 0.02% | 0.03% | 0.00% | 0.00% |
| G3MYM8 | 0.02% | 0.00% | 0.02% | 0.00% |
| F1N0K0 | 0.02% | 0.01% | 0.00% | 0.00% |
| F1MDC2 | 0.02% | 0.02% | 0.00% | 0.00% |
| A7YY47 | 0.02% | 0.02% | 0.02% | 0.04% |
| A0JN39 | 0.02% | 0.00% | 0.01% | 0.00% |
| F1N6Y1 | 0.02% | 0.02% | 0.02% | 0.01% |
| Q8HXV0 | 0.02% | 0.02% | 0.02% | 0.02% |
| P80227 | 0.01% | 0.00% | 0.00% | 0.00% |
| E1BMC4 | 0.01% | 0.01% | 0.02% | 0.02% |
| E1BIG6 | 0.01% | 0.02% | 0.02% | 0.00% |
| A7MB83 | 0.01% | 0.01% | 0.00% | 0.00% |
| F1MF97 | 0.01% | 0.01% | 0.00% | 0.00% |
| E1BMQ6 | 0.01% | 0.02% | 0.00% | 0.00% |
| E1BGJ0 | 0.01% | 0.01% | 0.01% | 0.00% |
| G5E5W1 | 0.01% | 0.01% | 0.00% | 0.01% |
| F1MPU0 | 0.01% | 0.03% | 0.01% | 0.01% |
| F1MPK6 | 0.01% | 0.00% | 0.00% | 0.00% |
| E1BKX7 | 0.00% | 0.01% | 0.00% | 0.00% |
| Q7M2Y2 | 0.00% | 0.05% | 0.00% | 0.00% |
| Q3SZ87 | 0.00% | 0.00% | 0.06% | 0.00% |
| A7E3W4 | 0.00% | 0.03% | 0.02% | 0.00% |
| Q5E9F5 | 0.00% | 0.00% | 0.00% | 0.11% |
| P35705 | 0.00% | 0.04% | 0.05% | 0.00% |
| Q3MHL7 | 0.00% | 0.02% | 0.00% | 0.00% |
| F1MTT6 | 0.00% | 0.02% | 0.00% | 0.00% |
| E1BGX1 | 0.00% | 0.02% | 0.00% | 0.03% |
| A7E355 | 0.00% | 0.02% | 0.00% | 0.00% |
| E1BMM6 | 0.00% | 0.00% | 0.00% | 0.04% |
| P61955 | 0.00% | 0.00% | 0.12% | 0.00% |
| Q861V1 | 0.00% | 0.07% | 0.00% | 0.00% |
| Q862B7 | 0.00% | 0.08% | 0.17% | 0.00% |
| Q862J9 | 0.00% | 0.11% | 0.09% | 0.12% |
| Q862R2 | 0.00% | 0.06% | 0.10% | 0.00% |
| A1L5B7 | 0.00% | 0.04% | 0.00% | 0.00% |
| Q58D70 | 0.00% | 0.00% | 0.04% | 0.00% |
| D3JUI8 | 0.00% | 0.00% | 0.00% | 0.04% |
| A6QNM2 | 0.00% | 0.01% | 0.00% | 0.00% |



|            |       |       |       |       |
|------------|-------|-------|-------|-------|
| Q9N1X8     | 0.00% | 0.12% | 0.00% | 0.00% |
| Q5E9K0     | 0.00% | 0.13% | 0.00% | 0.00% |
| Q2TBX6     | 0.00% | 0.11% | 0.00% | 0.00% |
| Q3T0Y5     | 0.00% | 0.05% | 0.00% | 0.00% |
| G5E5C3     | 0.00% | 0.00% | 0.00% | 0.06% |
| Q8WN55     | 0.00% | 0.00% | 0.00% | 0.04% |
| P61286     | 0.00% | 0.03% | 0.00% | 0.00% |
| Q3SZ62     | 0.00% | 0.10% | 0.09% | 0.00% |
| Q9BG14     | 0.00% | 0.13% | 0.18% | 0.14% |
| P80311     | 0.00% | 0.13% | 0.11% | 0.13% |
| Q861V5     | 0.00% | 0.07% | 0.00% | 0.09% |
| P08814     | 0.00% | 0.16% | 0.00% | 0.00% |
| Q58CQ9     | 0.00% | 0.03% | 0.00% | 0.00% |
| P52175     | 0.00% | 0.10% | 0.08% | 0.00% |
| P67808     | 0.00% | 0.13% | 0.13% | 0.11% |
| Q5E9X4     | 0.00% | 0.05% | 0.00% | 0.05% |
| Q3SWY3     | 0.00% | 0.00% | 0.04% | 0.03% |
| Q2HJ60     | 0.00% | 0.08% | 0.07% | 0.00% |
| F1MFT4     | 0.00% | 0.07% | 0.08% | 0.05% |
| A5D9H5     | 0.00% | 0.05% | 0.00% | 0.00% |
| Q3ZC44     | 0.00% | 0.06% | 0.00% | 0.00% |
| E1BBY7     | 0.00% | 0.00% | 0.00% | 0.02% |
| Q7M3G9     | 0.00% | 0.00% | 0.14% | 0.18% |
| D5MTL9     | 0.00% | 0.00% | 0.14% | 0.00% |
| Q3ZBY4     | 0.00% | 0.03% | 0.00% | 0.00% |
| Q9TU47     | 0.00% | 0.04% | 0.00% | 0.00% |
| F1MN49     | 0.00% | 0.11% | 0.00% | 0.00% |
| Q3MHP6     | 0.00% | 0.01% | 0.00% | 0.00% |
| L7R5X3     | 0.00% | 0.00% | 0.00% | 0.05% |
| E1BPX2     | 0.00% | 0.00% | 0.00% | 0.04% |
| A3KN04     | 0.00% | 0.00% | 0.02% | 0.00% |
| Q58D10     | 0.00% | 0.05% | 0.06% | 0.00% |
| Q5E954     | 0.00% | 0.00% | 0.03% | 0.00% |
| F1MBQ8     | 0.00% | 0.02% | 0.02% | 0.00% |
| Q5E970     | 0.00% | 0.00% | 0.00% | 0.05% |
| C0L633     | 0.00% | 0.00% | 0.04% | 0.00% |
| P02453     | 0.00% | 0.01% | 0.00% | 0.00% |
| P35604     | 0.00% | 0.00% | 0.06% | 0.00% |
| A0A140T856 | 0.00% | 0.00% | 0.01% | 0.00% |
| Q2TBQ1     | 0.00% | 0.02% | 0.02% | 0.00% |
| Q29RK1     | 0.00% | 0.05% | 0.03% | 0.00% |
| F1N1C9     | 0.00% | 0.01% | 0.00% | 0.01% |
| Q5E9F1     | 0.00% | 0.06% | 0.05% | 0.00% |
| Q28141     | 0.00% | 0.02% | 0.00% | 0.00% |

|        |       |       |       |       |
|--------|-------|-------|-------|-------|
| Q3ZBE1 | 0.00% | 0.06% | 0.00% | 0.00% |
| P39872 | 0.00% | 0.00% | 0.03% | 0.03% |
| F1N2W8 | 0.00% | 0.06% | 0.10% | 0.08% |
| Q56JZ1 | 0.00% | 0.07% | 0.11% | 0.00% |
| A6QLG5 | 0.00% | 0.00% | 0.06% | 0.00% |
| G8JKY0 | 0.00% | 0.17% | 0.22% | 0.30% |
| Q5E988 | 0.00% | 0.00% | 0.09% | 0.00% |
| Q56JV9 | 0.00% | 0.06% | 0.07% | 0.05% |
| Q32PD5 | 0.00% | 0.33% | 0.32% | 0.40% |
| Q76I82 | 0.00% | 0.08% | 0.13% | 0.00% |
| O02691 | 0.00% | 0.04% | 0.05% | 0.00% |

Table S4. List of all detected proteins in the hard corona of M-1, M-1MF, M-4, M-4MF.

| Protein IDs | M-1   | M-1MF | M-4   | M-4MF |
|-------------|-------|-------|-------|-------|
| V6F9A2      | 1.50% | 1.56% | 1.69% | 1.57% |
| P02081      | 1.36% | 1.16% | 1.56% | 1.60% |
| A0A140T897  | 0.97% | 0.99% | 1.13% | 1.27% |
| B0JYQ0      | 0.94% | 0.97% | 1.09% | 1.24% |
| P02070      | 0.93% | 0.92% | 1.07% | 1.22% |
| D4QBB3      | 0.87% | 0.82% | 0.99% | 1.09% |
| P01966      | 0.75% | 0.76% | 0.89% | 0.88% |
| G3X807      | 0.74% | 0.72% | 0.81% | 0.92% |
| P42899      | 0.73% | 0.49% | 0.60% | 0.69% |
| P61603      | 0.70% | 0.72% | 0.81% | 0.98% |
| F1N3Q7      | 0.66% | 0.70% | 0.79% | 0.75% |
| P04264      | 0.63% | 0.74% | 0.88% | 1.10% |
| P02754      | 0.63% | 0.66% | 0.80% | 0.91% |
| Q03247      | 0.61% | 0.64% | 0.75% | 0.69% |
| P05787      | 0.60% | 0.59% | 0.59% | 0.70% |
| P13645      | 0.54% | 0.64% | 0.74% | 0.85% |
| B5B0D4      | 0.53% | 0.58% | 0.71% | 0.74% |
| P60712      | 0.51% | 0.49% | 0.51% | 0.54% |
| G3X6Q8      | 0.51% | 0.31% | 0.53% | 0.38% |
| P81644      | 0.51% | 0.47% | 0.58% | 0.60% |
| P62157      | 0.51% | 0.53% | 0.52% | 0.36% |
| Q2KJD0      | 0.50% | 0.38% | 0.50% | 0.51% |
| P02662      | 0.50% | 0.44% | 0.69% | 0.87% |
| Q3MHM5      | 0.50% | 0.38% | 0.48% | 0.48% |
| F1MYX2      | 0.50% | 0.37% | 0.56% | 0.44% |
| Q76LV1      | 0.49% | 0.44% | 0.49% | 0.45% |

|                    |       |       |       |       |
|--------------------|-------|-------|-------|-------|
| P00735             | 0.49% | 0.43% | 0.52% | 0.55% |
| P48616             | 0.47% | 0.52% | 0.46% | 0.49% |
| P34955             | 0.47% | 0.48% | 0.54% | 0.51% |
| P35908             | 0.46% | 0.64% | 0.75% | 0.83% |
| E1BNR0             | 0.46% | 0.42% | 0.53% | 0.49% |
| P63103             | 0.45% | 0.51% | 0.53% | 0.51% |
| Q76LV2             | 0.44% | 0.37% | 0.44% | 0.41% |
| E1BJK2             | 0.44% | 0.45% | 0.48% | 0.45% |
| P17697             | 0.44% | 0.38% | 0.46% | 0.44% |
| P00745             | 0.44% | 0.26% | 0.39% | 0.34% |
| F1MSZ6             | 0.44% | 0.38% | 0.50% | 0.48% |
| G3X6N3             | 0.44% | 0.54% | 0.51% | 0.66% |
| Q0IHK2             | 0.44% | 0.53% | 0.50% | 0.64% |
| Q2KIW1             | 0.43% | 0.37% | 0.38% | 0.30% |
| P08729             | 0.43% | 0.50% | 0.27% | 0.46% |
| Q2UVX4             | 0.42% | 0.42% | 0.56% | 0.65% |
| Q5E9F7             | 0.41% | 0.48% | 0.51% | 0.54% |
| Q5GN72             | 0.41% | 0.34% | 0.30% | 0.38% |
| Q1RMK2             | 0.41% | 0.36% | 0.46% | 0.52% |
| P62261             | 0.41% | 0.49% | 0.40% | 0.34% |
| V6F9A3             | 0.40% | 0.44% | 0.38% | 0.56% |
| Q3ZBS7             | 0.39% | 0.43% | 0.47% | 0.47% |
| K4JDR8             | 0.39% | 0.39% | 0.50% | 0.52% |
| Q7SIH1             | 0.39% | 0.35% | 0.47% | 0.46% |
| P04272             | 0.38% | 0.41% | 0.37% | 0.43% |
| F1MYG5             | 0.38% | 0.40% | 0.32% | 0.40% |
| ENSBTAP00000007350 | 0.38% | 0.35% | 0.44% | 0.35% |
| P35527             | 0.38% | 0.51% | 0.56% | 0.77% |
| Q5E956             | 0.38% | 0.35% | 0.40% | 0.45% |
| Q2HJ60             | 0.37% | 0.37% | 0.31% | 0.43% |
| Q5E9I6             | 0.37% | 0.18% | 0.31% | 0.32% |
| ENSBTAP00000014147 | 0.37% | 0.31% | 0.45% | 0.51% |
| Q3MHW2             | 0.37% | 0.35% | 0.43% | 0.32% |
| O46375             | 0.36% | 0.30% | 0.37% | 0.38% |
| Q3ZBG0             | 0.36% | 0.26% | 0.19% | 0.14% |
| K4JF16             | 0.36% | 0.29% | 0.42% | 0.43% |
| P01252             | 0.36% | 0.57% | 0.54% | 0.61% |
| Q27967             | 0.35% | 0.32% | 0.41% | 0.35% |
| P09867             | 0.35% | 0.34% | 0.29% | 0.39% |
| Q8SQH5             | 0.35% | 0.32% | 0.27% | 0.37% |
| P10096             | 0.35% | 0.34% | 0.36% | 0.34% |
| Q3SZI4             | 0.34% | 0.36% | 0.36% | 0.29% |
| Q32S29             | 0.34% | 0.34% | 0.42% | 0.43% |
| O46739             | 0.34% | 0.35% | 0.18% | 0.10% |

|                    |       |       |       |       |
|--------------------|-------|-------|-------|-------|
| Q3ZBX9             | 0.34% | 0.30% | 0.29% | 0.43% |
| Q3MHN5             | 0.34% | 0.31% | 0.32% | 0.31% |
| Q3T0X5             | 0.34% | 0.28% | 0.28% | 0.11% |
| Q3SWW8             | 0.34% | 0.32% | 0.43% | 0.41% |
| Q5E9Z2             | 0.34% | 0.33% | 0.36% | 0.33% |
| P12763             | 0.34% | 0.37% | 0.41% | 0.50% |
| P81948             | 0.33% | 0.32% | 0.40% | 0.42% |
| P02663             | 0.33% | 0.24% | 0.43% | 0.47% |
| A6QNW7             | 0.33% | 0.41% | 0.40% | 0.47% |
| Q2HJ86             | 0.33% | 0.31% | 0.41% | 0.40% |
| Q3T0Q4             | 0.33% | 0.30% | 0.27% | 0.31% |
| ENSBTAP00000024462 | 0.33% | 0.23% | 0.34% | 0.39% |
| Q3SZF2             | 0.33% | 0.15% | 0.26% | 0.20% |
| P63048             | 0.32% | 0.36% | 0.32% | 0.41% |
| Q0VCX2             | 0.32% | 0.33% | 0.28% | 0.35% |
| Q3T169             | 0.32% | 0.28% | 0.18% | 0.33% |
| Q2KIH2             | 0.32% | 0.33% | 0.39% | 0.42% |
| P00761             | 0.31% | 0.34% | 0.39% | 0.41% |
| Q861V5             | 0.31% | 0.25% | 0.21% | 0.20% |
| Q3T101             | 0.31% | 0.34% | 0.38% | 0.41% |
| F1N453             | 0.31% | 0.38% | 0.34% | 0.34% |
| Q7M365             | 0.31% | 0.34% | 0.38% | 0.29% |
| P68250             | 0.31% | 0.32% | 0.33% | 0.33% |
| P28800             | 0.31% | 0.29% | 0.37% | 0.28% |
| P00978             | 0.30% | 0.27% | 0.34% | 0.27% |
| Q1RMN9             | 0.30% | 0.29% | 0.40% | 0.46% |
| P52175             | 0.30% | 0.30% | 0.20% | 0.19% |
| Q28049             | 0.30% | 0.19% | 0.46% | 0.57% |
| P19120             | 0.30% | 0.32% | 0.26% | 0.26% |
| Q32KL2             | 0.30% | 0.15% | 0.21% | 0.12% |
| Q9TS85             | 0.30% | 0.31% | 0.37% | 0.31% |
| P22226             | 0.30% | 0.36% | 0.30% | 0.11% |
| P52193             | 0.30% | 0.18% | 0.29% | 0.14% |
| P61223             | 0.30% | 0.28% | 0.25% | 0.26% |
| Q9N2I2             | 0.30% | 0.28% | 0.31% | 0.25% |
| P45879             | 0.30% | 0.19% | 0.17% | 0.26% |
| P61284             | 0.29% | 0.21% | 0.26% | 0.26% |
| ENSBTAP00000024466 | 0.29% | 0.25% | 0.35% | 0.41% |
| Q3T054             | 0.29% | 0.24% | 0.26% | 0.30% |
| Q1RMN8             | 0.29% | 0.34% | 0.38% | 0.38% |
| A5D984             | 0.29% | 0.25% | 0.22% | 0.25% |
| P02533             | 0.29% | 0.52% | 0.50% | 0.73% |
| Q2TBR3             | 0.28% | 0.29% | 0.26% | 0.31% |
| Q9BGI4             | 0.28% | 0.36% | 0.24% | 0.27% |

---

|                    |       |       |       |       |
|--------------------|-------|-------|-------|-------|
| P35445             | 0.28% | 0.29% | 0.34% | 0.31% |
| Q95140             | 0.28% | 0.28% | 0.29% | 0.21% |
| G9HR27             | 0.28% | 0.24% | 0.19% | 0.13% |
| P17690             | 0.27% | 0.28% | 0.22% | 0.19% |
| Q3ZC07             | 0.27% | 0.29% | 0.28% | 0.32% |
| Q3MHN2             | 0.27% | 0.24% | 0.31% | 0.31% |
| Q32PD5             | 0.27% | 0.39% | 0.26% | 0.25% |
| Q29RQ1             | 0.27% | 0.22% | 0.41% | 0.47% |
| Q27975             | 0.27% | 0.24% | 0.18% | 0.18% |
| A8YXZ2             | 0.26% | 0.15% | 0.37% | 0.48% |
| P00829             | 0.26% | 0.26% | 0.22% | 0.29% |
| Q3T0D5             | 0.26% | 0.29% | 0.18% | 0.21% |
| F1MNW4             | 0.26% | 0.26% | 0.29% | 0.31% |
| B8Y9S9             | 0.26% | 0.26% | 0.28% | 0.24% |
| ENSBTAP00000018574 | 0.26% | 0.26% | 0.31% | 0.33% |
| Q3Y5Z3             | 0.26% | 0.24% | 0.22% | 0.15% |
| Q3ZBF7             | 0.26% | 0.28% | 0.19% | 0.18% |
| A6QLL8             | 0.25% | 0.19% | 0.21% | 0.24% |
| G3X6E5             | 0.25% | 0.11% | 0.31% | 0.00% |
| Q5E987             | 0.25% | 0.12% | 0.16% | 0.08% |
| P02668             | 0.25% | 0.25% | 0.28% | 0.35% |
| G1K1K0             | 0.25% | 0.15% | 0.22% | 0.10% |
| P02676             | 0.25% | 0.32% | 0.22% | 0.11% |
| P68103             | 0.25% | 0.21% | 0.23% | 0.24% |
| O46738             | 0.25% | 0.27% | 0.12% | 0.00% |
| P00432             | 0.25% | 0.27% | 0.18% | 0.11% |
| Q95M18             | 0.24% | 0.22% | 0.20% | 0.20% |
| Q28065             | 0.24% | 0.23% | 0.31% | 0.23% |
| P61356             | 0.24% | 0.17% | 0.19% | 0.21% |
| Q3SYR8             | 0.24% | 0.27% | 0.30% | 0.34% |
| Q3T165             | 0.24% | 0.23% | 0.10% | 0.18% |
| Q8MII4             | 0.24% | 0.26% | 0.20% | 0.00% |
| P04259             | 0.24% | 0.40% | 0.38% | 0.64% |
| P48668             | 0.24% | 0.40% | 0.38% | 0.63% |
| Q2TBX6             | 0.24% | 0.08% | 0.13% | 0.15% |
| Q5E9B1             | 0.23% | 0.24% | 0.21% | 0.20% |
| P02538             | 0.23% | 0.40% | 0.37% | 0.63% |
| Q1RMH5             | 0.23% | 0.18% | 0.22% | 0.21% |
| Q3SZV7             | 0.23% | 0.18% | 0.27% | 0.26% |
| F1MUZ9             | 0.23% | 0.28% | 0.22% | 0.22% |
| Q3ZCH0             | 0.23% | 0.29% | 0.20% | 0.23% |
| P68002             | 0.23% | 0.23% | 0.09% | 0.23% |
| Q862S8             | 0.23% | 0.25% | 0.20% | 0.36% |
| P05307             | 0.23% | 0.20% | 0.12% | 0.21% |

---

---

|            |       |       |       |       |
|------------|-------|-------|-------|-------|
| A6QL81     | 0.22% | 0.22% | 0.23% | 0.00% |
| P02672     | 0.22% | 0.25% | 0.25% | 0.18% |
| Q3MHL4     | 0.22% | 0.18% | 0.27% | 0.27% |
| A7Z057     | 0.22% | 0.26% | 0.31% | 0.19% |
| Q29RU4     | 0.22% | 0.17% | 0.38% | 0.39% |
| Q1JPA2     | 0.22% | 0.17% | 0.12% | 0.11% |
| Q04695     | 0.22% | 0.36% | 0.27% | 0.42% |
| P02722     | 0.22% | 0.19% | 0.18% | 0.22% |
| F1MX87     | 0.22% | 0.21% | 0.32% | 0.37% |
| P01044     | 0.21% | 0.19% | 0.21% | 0.20% |
| FIN3A1     | 0.21% | 0.30% | 0.31% | 0.37% |
| Q5J801     | 0.21% | 0.17% | 0.24% | 0.24% |
| P55252     | 0.21% | 0.24% | 0.29% | 0.05% |
| Q3T149     | 0.21% | 0.23% | 0.18% | 0.12% |
| A0A1V1FP73 | 0.21% | 0.23% | 0.17% | 0.20% |
| Q58D62     | 0.21% | 0.23% | 0.29% | 0.28% |
| P56652     | 0.21% | 0.17% | 0.24% | 0.17% |
| Q3ZCK9     | 0.21% | 0.11% | 0.12% | 0.07% |
| G5E5C3     | 0.21% | 0.15% | 0.15% | 0.00% |
| A0A0F6QMJ3 | 0.21% | 0.16% | 0.31% | 0.36% |
| P38657     | 0.21% | 0.21% | 0.15% | 0.20% |
| Q05443     | 0.21% | 0.16% | 0.20% | 0.14% |
| O18979     | 0.21% | 0.15% | 0.24% | 0.22% |
| E1BPN4     | 0.21% | 0.14% | 0.21% | 0.11% |
| P19483     | 0.21% | 0.23% | 0.22% | 0.22% |
| Q28178     | 0.21% | 0.30% | 0.30% | 0.37% |
| F1MZ00     | 0.21% | 0.11% | 0.00% | 0.00% |
| Q0QEV5     | 0.20% | 0.22% | 0.16% | 0.18% |
| P01045     | 0.20% | 0.18% | 0.20% | 0.18% |
| A5D7L1     | 0.20% | 0.07% | 0.28% | 0.09% |
| Q32KY0     | 0.20% | 0.22% | 0.25% | 0.22% |
| P13647     | 0.20% | 0.37% | 0.41% | 0.48% |
| Q2TBP7     | 0.20% | 0.00% | 0.00% | 0.00% |
| G8JKY0     | 0.20% | 0.13% | 0.12% | 0.14% |
| P60661     | 0.20% | 0.22% | 0.24% | 0.20% |
| F1MKS5     | 0.20% | 0.17% | 0.22% | 0.18% |
| A1XED1     | 0.20% | 0.32% | 0.12% | 0.23% |
| P21809     | 0.20% | 0.15% | 0.23% | 0.03% |
| Q32L76     | 0.20% | 0.21% | 0.40% | 0.32% |
| A4IF97     | 0.19% | 0.13% | 0.09% | 0.10% |
| Q3SX47     | 0.19% | 0.16% | 0.18% | 0.14% |
| Q2TBQ5     | 0.19% | 0.21% | 0.16% | 0.22% |
| Q3T0D0     | 0.19% | 0.25% | 0.16% | 0.20% |
| F1N102     | 0.19% | 0.16% | 0.26% | 0.30% |

---

|                    |       |       |       |       |
|--------------------|-------|-------|-------|-------|
| Q3SZ54             | 0.19% | 0.22% | 0.19% | 0.20% |
| P22457             | 0.19% | 0.19% | 0.20% | 0.14% |
| Q3SYU2             | 0.19% | 0.17% | 0.10% | 0.14% |
| P81287             | 0.19% | 0.16% | 0.21% | 0.22% |
| Q0VCM5             | 0.18% | 0.18% | 0.21% | 0.17% |
| Q862B7             | 0.18% | 0.17% | 0.19% | 0.17% |
| Q3T0P6             | 0.18% | 0.19% | 0.16% | 0.23% |
| Q9XSJ4             | 0.18% | 0.18% | 0.22% | 0.24% |
| Q3SYW7             | 0.18% | 0.12% | 0.13% | 0.06% |
| O02717             | 0.18% | 0.20% | 0.12% | 0.13% |
| A5D7D1             | 0.18% | 0.23% | 0.08% | 0.11% |
| P23805             | 0.18% | 0.18% | 0.28% | 0.35% |
| Q32PA1             | 0.17% | 0.31% | 0.26% | 0.29% |
| P00741             | 0.17% | 0.16% | 0.18% | 0.19% |
| Q56K11             | 0.17% | 0.26% | 0.21% | 0.08% |
| Q862Q3             | 0.17% | 0.19% | 0.21% | 0.24% |
| P67808             | 0.17% | 0.26% | 0.20% | 0.30% |
| Q17QH1             | 0.17% | 0.14% | 0.19% | 0.16% |
| Q5EA96             | 0.17% | 0.10% | 0.11% | 0.06% |
| P68509             | 0.17% | 0.19% | 0.19% | 0.09% |
| Q3B8S0             | 0.17% | 0.19% | 0.00% | 0.09% |
| P80195             | 0.17% | 0.00% | 0.17% | 0.23% |
| ENSBTAP00000038329 | 0.17% | 0.18% | 0.27% | 0.23% |
| E1BI02             | 0.17% | 0.16% | 0.19% | 0.16% |
| P51122             | 0.17% | 0.28% | 0.14% | 0.00% |
| Q5E9K0             | 0.17% | 0.11% | 0.08% | 0.00% |
| Q56JX8             | 0.17% | 0.09% | 0.00% | 0.16% |
| P33672             | 0.17% | 0.07% | 0.15% | 0.09% |
| P00744             | 0.17% | 0.20% | 0.19% | 0.14% |
| Q3T0Y5             | 0.17% | 0.08% | 0.11% | 0.08% |
| Q9TTE1             | 0.17% | 0.13% | 0.20% | 0.26% |
| Q9GL29             | 0.17% | 0.00% | 0.14% | 0.23% |
| P35541             | 0.16% | 0.18% | 0.20% | 0.14% |
| Q29437             | 0.16% | 0.10% | 0.13% | 0.05% |
| E3SAZ8             | 0.16% | 0.15% | 0.15% | 0.19% |
| XP_001252647       | 0.16% | 0.16% | 0.19% | 0.20% |
| A4FV54             | 0.16% | 0.16% | 0.20% | 0.20% |
| Q2KII3             | 0.16% | 0.18% | 0.00% | 0.00% |
| A6QR15             | 0.16% | 0.18% | 0.11% | 0.12% |
| P26452             | 0.16% | 0.14% | 0.20% | 0.20% |
| F6S1Q0             | 0.16% | 0.18% | 0.15% | 0.21% |
| Q2HJ97             | 0.16% | 0.09% | 0.07% | 0.08% |
| P19858             | 0.16% | 0.22% | 0.18% | 0.15% |
| Q862R3             | 0.16% | 0.17% | 0.06% | 0.15% |

|                    |       |       |       |       |
|--------------------|-------|-------|-------|-------|
| Q5E9F8             | 0.16% | 0.17% | 0.15% | 0.26% |
| H6V5E5             | 0.16% | 0.20% | 0.10% | 0.00% |
| Q3SZZ9             | 0.16% | 0.16% | 0.17% | 0.08% |
| ENSBTAP00000037665 | 0.15% | 0.11% | 0.16% | 0.04% |
| Q1LZ81             | 0.15% | 0.12% | 0.00% | 0.15% |
| F1MC75             | 0.15% | 0.15% | 0.17% | 0.12% |
| O77834             | 0.15% | 0.19% | 0.16% | 0.19% |
| F1N401             | 0.15% | 0.15% | 0.16% | 0.07% |
| Q28107             | 0.15% | 0.16% | 0.16% | 0.11% |
| Q58DW0             | 0.15% | 0.10% | 0.06% | 0.10% |
| Q5EA67             | 0.15% | 0.18% | 0.17% | 0.18% |
| Q3ZBW4             | 0.15% | 0.15% | 0.12% | 0.00% |
| A5PJT7             | 0.15% | 0.15% | 0.10% | 0.07% |
| P08779             | 0.15% | 0.32% | 0.28% | 0.52% |
| Q3T108             | 0.15% | 0.11% | 0.12% | 0.05% |
| Q3SX14             | 0.15% | 0.16% | 0.17% | 0.12% |
| Q3T0Z8             | 0.15% | 0.11% | 0.00% | 0.00% |
| ENSBTAP00000013050 | 0.15% | 0.12% | 0.18% | 0.06% |
| F1N076             | 0.15% | 0.10% | 0.12% | 0.06% |
| Q2KIV9             | 0.14% | 0.18% | 0.13% | 0.08% |
| O46415             | 0.14% | 0.08% | 0.09% | 0.00% |
| Q28017             | 0.14% | 0.13% | 0.16% | 0.05% |
| P61283             | 0.14% | 0.16% | 0.00% | 0.00% |
| Q3SZP2             | 0.14% | 0.11% | 0.14% | 0.07% |
| P80311             | 0.14% | 0.13% | 0.15% | 0.17% |
| P07224             | 0.14% | 0.21% | 0.16% | 0.20% |
| F1N169             | 0.14% | 0.14% | 0.12% | 0.11% |
| Q3SZ57             | 0.14% | 0.20% | 0.14% | 0.19% |
| Q32L58             | 0.14% | 0.00% | 0.17% | 0.13% |
| Q2TBU0             | 0.14% | 0.12% | 0.12% | 0.07% |
| A7E3W2             | 0.14% | 0.07% | 0.12% | 0.03% |
| Q3SZH5             | 0.14% | 0.12% | 0.12% | 0.15% |
| P63243             | 0.14% | 0.15% | 0.12% | 0.11% |
| ENSBTAP00000016046 | 0.14% | 0.15% | 0.16% | 0.09% |
| A7YWC6             | 0.13% | 0.18% | 0.08% | 0.14% |
| F1MW44             | 0.13% | 0.17% | 0.20% | 0.15% |
| Q3T004             | 0.13% | 0.19% | 0.09% | 0.00% |
| F1MQ37             | 0.13% | 0.14% | 0.11% | 0.08% |
| P61955             | 0.13% | 0.15% | 0.00% | 0.00% |
| P05784             | 0.13% | 0.14% | 0.12% | 0.17% |
| Q4ZJS0             | 0.13% | 0.13% | 0.09% | 0.05% |
| Q865R3             | 0.13% | 0.10% | 0.00% | 0.06% |
| K7QF89             | 0.13% | 0.17% | 0.12% | 0.00% |
| Q76I82             | 0.13% | 0.14% | 0.12% | 0.18% |



---

|        |       |       |       |       |
|--------|-------|-------|-------|-------|
| Q7YRW9 | 0.13% | 0.12% | 0.05% | 0.09% |
| P60902 | 0.13% | 0.14% | 0.10% | 0.18% |
| Q5E9F5 | 0.13% | 0.07% | 0.05% | 0.15% |
| F1MX83 | 0.13% | 0.09% | 0.00% | 0.12% |
| A6QLS9 | 0.13% | 0.14% | 0.10% | 0.12% |
| G8JKX6 | 0.13% | 0.09% | 0.13% | 0.06% |
| A6H767 | 0.13% | 0.14% | 0.13% | 0.12% |
| Q30287 | 0.13% | 0.12% | 0.09% | 0.00% |
| Q3B7N2 | 0.13% | 0.15% | 0.09% | 0.08% |
| P08814 | 0.13% | 0.18% | 0.10% | 0.00% |
| Q862N4 | 0.13% | 0.14% | 0.15% | 0.18% |
| A2I7N1 | 0.12% | 0.15% | 0.15% | 0.16% |
| G9HQX2 | 0.12% | 0.10% | 0.08% | 0.00% |
| P62894 | 0.12% | 0.13% | 0.00% | 0.11% |
| Q2T9Y9 | 0.12% | 0.13% | 0.07% | 0.11% |
| F1MJQ1 | 0.12% | 0.11% | 0.00% | 0.00% |
| P02666 | 0.12% | 0.09% | 0.15% | 0.20% |
| E1BMX5 | 0.12% | 0.10% | 0.10% | 0.06% |
| Q0VC36 | 0.12% | 0.13% | 0.06% | 0.07% |
| P08728 | 0.12% | 0.17% | 0.16% | 0.20% |
| P19427 | 0.12% | 0.07% | 0.17% | 0.11% |
| Q3SZC0 | 0.12% | 0.13% | 0.14% | 0.16% |
| Q5KR47 | 0.12% | 0.13% | 0.11% | 0.10% |
| Q5E9A3 | 0.11% | 0.13% | 0.09% | 0.11% |
| F1MD83 | 0.11% | 0.13% | 0.14% | 0.16% |
| H2CNR1 | 0.11% | 0.20% | 0.20% | 0.19% |
| Q2KJH6 | 0.11% | 0.10% | 0.08% | 0.10% |
| Q3SYZ7 | 0.11% | 0.25% | 0.00% | 0.00% |
| A7MB04 | 0.11% | 0.10% | 0.08% | 0.07% |
| F1MPH3 | 0.11% | 0.07% | 0.12% | 0.02% |
| Q56JV9 | 0.11% | 0.11% | 0.00% | 0.00% |
| Q58DL9 | 0.11% | 0.09% | 0.15% | 0.04% |
| Q8HYW7 | 0.11% | 0.07% | 0.00% | 0.00% |
| Q9TU47 | 0.11% | 0.04% | 0.00% | 0.00% |
| Q5E9F9 | 0.11% | 0.10% | 0.12% | 0.10% |
| Q3ZC10 | 0.11% | 0.08% | 0.00% | 0.00% |
| F1MDH3 | 0.11% | 0.10% | 0.12% | 0.08% |
| Q3ZBH8 | 0.11% | 0.12% | 0.00% | 0.00% |
| F1MPE1 | 0.11% | 0.09% | 0.12% | 0.04% |
| F1MTN1 | 0.10% | 0.11% | 0.12% | 0.00% |
| Q5E988 | 0.10% | 0.07% | 0.00% | 0.00% |
| A7E3S8 | 0.10% | 0.08% | 0.10% | 0.06% |
| P80109 | 0.10% | 0.09% | 0.09% | 0.06% |
| P01267 | 0.10% | 0.06% | 0.11% | 0.02% |

---

|          |       |       |       |       |
|----------|-------|-------|-------|-------|
| P35705   | 0.10% | 0.11% | 0.08% | 0.12% |
| Q3ZBG1   | 0.10% | 0.07% | 0.10% | 0.06% |
| Q3SZ62   | 0.10% | 0.11% | 0.10% | 0.12% |
| F1MFT4   | 0.10% | 0.11% | 0.08% | 0.10% |
| P41541   | 0.10% | 0.09% | 0.08% | 0.02% |
| Q5E9E6   | 0.10% | 0.08% | 0.05% | 0.13% |
| Q3ZCI9   | 0.10% | 0.11% | 0.04% | 0.06% |
| Q3T0K2   | 0.09% | 0.09% | 0.06% | 0.06% |
| Q3ZC44   | 0.09% | 0.09% | 0.04% | 0.04% |
| Q9BGI2   | 0.09% | 0.10% | 0.08% | 0.11% |
| Q5U7H2   | 0.09% | 0.07% | 0.00% | 0.00% |
| Q5E9E3   | 0.09% | 0.10% | 0.09% | 0.10% |
| A6QLB3   | 0.09% | 0.06% | 0.11% | 0.02% |
| Q3ZBT1   | 0.09% | 0.09% | 0.09% | 0.08% |
| P02639   | 0.09% | 0.00% | 0.00% | 0.00% |
| P02768-1 | 0.09% | 0.14% | 0.11% | 0.20% |
| Q3KUS7   | 0.09% | 0.10% | 0.17% | 0.22% |
| P02253   | 0.09% | 0.12% | 0.14% | 0.16% |
| Q2TBI0   | 0.09% | 0.05% | 0.08% | 0.06% |
| Q1RMP3   | 0.09% | 0.10% | 0.11% | 0.00% |
| O77742   | 0.09% | 0.04% | 0.06% | 0.04% |
| E1BLI9   | 0.09% | 0.10% | 0.11% | 0.00% |
| Q58D10   | 0.09% | 0.10% | 0.00% | 0.00% |
| Q3SZF3   | 0.09% | 0.10% | 0.10% | 0.08% |
| F1MER7   | 0.09% | 0.08% | 0.09% | 0.05% |
| A6QNL5   | 0.09% | 0.06% | 0.06% | 0.07% |
| Q6Y1E2   | 0.09% | 0.06% | 0.07% | 0.00% |
| F1MN49   | 0.09% | 0.09% | 0.00% | 0.12% |
| Q9TTK6   | 0.08% | 0.05% | 0.06% | 0.03% |
| A7Z066   | 0.08% | 0.09% | 0.09% | 0.11% |
| Q58DU5   | 0.08% | 0.04% | 0.06% | 0.00% |
| Q3YFG5   | 0.08% | 0.05% | 0.09% | 0.05% |
| Q58DS9   | 0.08% | 0.11% | 0.13% | 0.14% |
| A7E3W4   | 0.08% | 0.06% | 0.04% | 0.05% |
| Q2KJF1   | 0.08% | 0.18% | 0.10% | 0.12% |
| Q0QF29   | 0.08% | 0.11% | 0.08% | 0.13% |
| D3JUI8   | 0.08% | 0.14% | 0.03% | 0.11% |
| F1N367   | 0.08% | 0.10% | 0.09% | 0.06% |
| Q3SYT9   | 0.08% | 0.06% | 0.05% | 0.11% |
| Q862R2   | 0.08% | 0.08% | 0.06% | 0.00% |
| O18789   | 0.08% | 0.10% | 0.06% | 0.09% |
| Q2TBX5   | 0.08% | 0.08% | 0.06% | 0.14% |
| F1N2K1   | 0.08% | 0.06% | 0.07% | 0.00% |
| P12624   | 0.08% | 0.05% | 0.06% | 0.06% |

|        |       |       |       |       |
|--------|-------|-------|-------|-------|
| Q2KHU8 | 0.07% | 0.06% | 0.00% | 0.04% |
| Q0VCX1 | 0.07% | 0.05% | 0.08% | 0.02% |
| Q3MHN0 | 0.07% | 0.06% | 0.05% | 0.08% |
| Q5E954 | 0.07% | 0.07% | 0.05% | 0.06% |
| Q3SZR8 | 0.07% | 0.00% | 0.06% | 0.07% |
| Q5KR48 | 0.07% | 0.14% | 0.04% | 0.12% |
| A5D9H5 | 0.07% | 0.06% | 0.05% | 0.00% |
| P12234 | 0.07% | 0.07% | 0.06% | 0.07% |
| O77709 | 0.07% | 0.08% | 0.05% | 0.02% |
| F1MND9 | 0.07% | 0.05% | 0.08% | 0.00% |
| Q3T087 | 0.07% | 0.08% | 0.00% | 0.10% |
| Q3YJG7 | 0.07% | 0.08% | 0.06% | 0.00% |
| Q95114 | 0.07% | 0.07% | 0.10% | 0.11% |
| P15781 | 0.07% | 0.05% | 0.07% | 0.08% |
| E1BJY4 | 0.07% | 0.08% | 0.07% | 0.00% |
| F1MM32 | 0.07% | 0.07% | 0.08% | 0.00% |
| Q2KIW4 | 0.07% | 0.07% | 0.07% | 0.04% |
| Q08E54 | 0.07% | 0.07% | 0.07% | 0.00% |
| Q3SYR5 | 0.07% | 0.00% | 0.08% | 0.00% |
| E1BI98 | 0.07% | 0.08% | 0.08% | 0.02% |
| Q17QC8 | 0.07% | 0.07% | 0.17% | 0.21% |
| P61585 | 0.07% | 0.00% | 0.00% | 0.06% |
| Q3MHM7 | 0.07% | 0.07% | 0.08% | 0.09% |
| F1MKG2 | 0.07% | 0.07% | 0.05% | 0.03% |
| A5D9E9 | 0.07% | 0.03% | 0.04% | 0.03% |
| Q9BGI3 | 0.07% | 0.00% | 0.00% | 0.00% |
| Q9TS78 | 0.07% | 0.00% | 0.00% | 0.00% |
| Q2TA40 | 0.07% | 0.08% | 0.08% | 0.09% |
| F1MHQ8 | 0.06% | 0.05% | 0.08% | 0.06% |
| Q3T0D7 | 0.06% | 0.09% | 0.00% | 0.06% |
| A6QLG5 | 0.06% | 0.09% | 0.00% | 0.12% |
| A3KN04 | 0.06% | 0.07% | 0.03% | 0.07% |
| P62194 | 0.06% | 0.05% | 0.06% | 0.06% |
| Q2KIF2 | 0.06% | 0.00% | 0.03% | 0.03% |
| P80724 | 0.06% | 0.11% | 0.08% | 0.09% |
| G3MYH4 | 0.06% | 0.07% | 0.00% | 0.00% |
| G8JKV5 | 0.06% | 0.07% | 0.05% | 0.09% |
| Q3T0L7 | 0.06% | 0.13% | 0.19% | 0.17% |
| Q3MHL3 | 0.06% | 0.07% | 0.06% | 0.06% |
| Q3SWX8 | 0.06% | 0.07% | 0.05% | 0.04% |
| Q56JZ1 | 0.06% | 0.06% | 0.07% | 0.06% |
| F1MVS9 | 0.06% | 0.05% | 0.07% | 0.03% |
| Q5E970 | 0.06% | 0.07% | 0.00% | 0.04% |
| Q5E983 | 0.06% | 0.11% | 0.09% | 0.05% |

---

|        |       |       |       |       |
|--------|-------|-------|-------|-------|
| G3MZI7 | 0.06% | 0.04% | 0.06% | 0.04% |
| Q861V1 | 0.06% | 0.09% | 0.00% | 0.00% |
| P05059 | 0.06% | 0.03% | 0.01% | 0.03% |
| P56701 | 0.06% | 0.05% | 0.05% | 0.03% |
| Q2HJ49 | 0.06% | 0.05% | 0.04% | 0.03% |
| F2Z4H3 | 0.06% | 0.00% | 0.00% | 0.00% |
| Q58DW5 | 0.06% | 0.08% | 0.05% | 0.06% |
| P79125 | 0.05% | 0.06% | 0.04% | 0.00% |
| Q5E9B7 | 0.05% | 0.08% | 0.09% | 0.00% |
| A7E350 | 0.05% | 0.06% | 0.05% | 0.02% |
| Q95121 | 0.05% | 0.06% | 0.05% | 0.04% |
| Q3T0K1 | 0.05% | 0.04% | 0.00% | 0.04% |
| F1MZ40 | 0.05% | 0.00% | 0.02% | 0.00% |
| Q3T0S6 | 0.05% | 0.09% | 0.00% | 0.10% |
| A7YY47 | 0.05% | 0.10% | 0.03% | 0.04% |
| Q92764 | 0.05% | 0.07% | 0.04% | 0.07% |
| E1BQ37 | 0.05% | 0.03% | 0.05% | 0.04% |
| F1N2W8 | 0.05% | 0.06% | 0.06% | 0.07% |
| Q2T9X2 | 0.05% | 0.07% | 0.03% | 0.05% |
| Q2KIG3 | 0.05% | 0.10% | 0.06% | 0.03% |
| F1N1G4 | 0.05% | 0.00% | 0.00% | 0.00% |
| P21793 | 0.05% | 0.07% | 0.04% | 0.00% |
| Q2TBP0 | 0.05% | 0.00% | 0.00% | 0.00% |
| F1MRZ8 | 0.05% | 0.00% | 0.06% | 0.00% |
| Q28034 | 0.05% | 0.03% | 0.05% | 0.02% |
| A7MBG8 | 0.05% | 0.03% | 0.02% | 0.03% |
| Q3ZBD9 | 0.05% | 0.00% | 0.06% | 0.00% |
| P35604 | 0.05% | 0.00% | 0.00% | 0.00% |
| Q3T0B6 | 0.05% | 0.05% | 0.04% | 0.04% |
| A6H7C4 | 0.05% | 0.08% | 0.06% | 0.10% |
| P13696 | 0.05% | 0.05% | 0.00% | 0.00% |
| Q5BIP9 | 0.05% | 0.00% | 0.00% | 0.10% |
| P18902 | 0.05% | 0.00% | 0.00% | 0.00% |
| G1K1R6 | 0.05% | 0.00% | 0.04% | 0.00% |
| A1L5B7 | 0.05% | 0.07% | 0.03% | 0.00% |
| A6QR38 | 0.05% | 0.00% | 0.04% | 0.06% |
| E1BCW0 | 0.04% | 0.03% | 0.00% | 0.00% |
| P52556 | 0.04% | 0.05% | 0.05% | 0.00% |
| Q2KIS7 | 0.04% | 0.12% | 0.08% | 0.15% |
| Q3ZCK3 | 0.04% | 0.00% | 0.05% | 0.06% |
| A6QNS6 | 0.04% | 0.02% | 0.03% | 0.01% |
| Q148H8 | 0.04% | 0.05% | 0.07% | 0.06% |
| Q8WN55 | 0.04% | 0.04% | 0.04% | 0.00% |
| P39872 | 0.04% | 0.02% | 0.00% | 0.00% |

---

---

|        |       |       |       |       |
|--------|-------|-------|-------|-------|
| P26779 | 0.04% | 0.05% | 0.07% | 0.02% |
| Q3SZC2 | 0.04% | 0.00% | 0.05% | 0.00% |
| F1MWR8 | 0.04% | 0.04% | 0.00% | 0.05% |
| Q58D70 | 0.04% | 0.04% | 0.03% | 0.04% |
| E1BFV0 | 0.04% | 0.06% | 0.07% | 0.08% |
| A7E3V7 | 0.04% | 0.04% | 0.05% | 0.05% |
| P49410 | 0.04% | 0.05% | 0.04% | 0.04% |
| F1N789 | 0.04% | 0.03% | 0.01% | 0.02% |
| P10103 | 0.04% | 0.04% | 0.00% | 0.00% |
| Q8SPF8 | 0.04% | 0.03% | 0.02% | 0.00% |
| Q32PI5 | 0.04% | 0.04% | 0.05% | 0.03% |
| A3KMV5 | 0.04% | 0.04% | 0.02% | 0.03% |
| Q3ZBY4 | 0.04% | 0.04% | 0.03% | 0.03% |
| Q29423 | 0.04% | 0.00% | 0.04% | 0.03% |
| P58352 | 0.04% | 0.05% | 0.05% | 0.02% |
| A1A4K8 | 0.03% | 0.04% | 0.00% | 0.00% |
| Q3SWY3 | 0.03% | 0.09% | 0.07% | 0.07% |
| C0L633 | 0.03% | 0.03% | 0.03% | 0.03% |
| P61286 | 0.03% | 0.03% | 0.00% | 0.03% |
| Q5E995 | 0.03% | 0.09% | 0.00% | 0.00% |
| A7YW37 | 0.03% | 0.05% | 0.00% | 0.00% |
| Q3T0L9 | 0.03% | 0.05% | 0.00% | 0.07% |
| Q3ZBH0 | 0.03% | 0.04% | 0.00% | 0.00% |
| Q2KJE5 | 0.03% | 0.04% | 0.04% | 0.03% |
| J9QCU0 | 0.03% | 0.04% | 0.04% | 0.03% |
| Q29RV1 | 0.03% | 0.06% | 0.02% | 0.03% |
| Q3ZBH5 | 0.03% | 0.06% | 0.04% | 0.00% |
| Q3MHE6 | 0.03% | 0.02% | 0.00% | 0.00% |
| F1MPJ7 | 0.03% | 0.05% | 0.00% | 0.00% |
| Q6LBN7 | 0.03% | 0.03% | 0.05% | 0.04% |
| A7MBA2 | 0.03% | 0.04% | 0.02% | 0.00% |
| F1N6W9 | 0.03% | 0.03% | 0.03% | 0.01% |
| L7R5X3 | 0.03% | 0.08% | 0.00% | 0.00% |
| Q2NL22 | 0.03% | 0.03% | 0.03% | 0.04% |
| F1MUC5 | 0.03% | 0.00% | 0.02% | 0.00% |
| F1MF97 | 0.03% | 0.00% | 0.03% | 0.01% |
| Q1JP95 | 0.03% | 0.03% | 0.04% | 0.00% |
| Q0VC47 | 0.03% | 0.00% | 0.00% | 0.04% |
| P11179 | 0.03% | 0.02% | 0.00% | 0.03% |
| Q5E9D7 | 0.03% | 0.03% | 0.02% | 0.00% |
| Q86YZ3 | 0.03% | 0.04% | 0.05% | 0.04% |
| P81282 | 0.03% | 0.03% | 0.03% | 0.01% |
| A7MBJ5 | 0.03% | 0.04% | 0.04% | 0.02% |
| Q3MHP6 | 0.03% | 0.00% | 0.03% | 0.03% |

---

---

|        |       |       |       |       |
|--------|-------|-------|-------|-------|
| F1MPU0 | 0.03% | 0.04% | 0.02% | 0.02% |
| Q5E9X4 | 0.03% | 0.05% | 0.03% | 0.04% |
| Q24JZ8 | 0.03% | 0.00% | 0.00% | 0.00% |
| E1BPX2 | 0.03% | 0.00% | 0.03% | 0.04% |
| Q148D3 | 0.03% | 0.00% | 0.00% | 0.00% |
| F1N6Y1 | 0.03% | 0.02% | 0.03% | 0.04% |
| Q3MHK9 | 0.03% | 0.00% | 0.00% | 0.00% |
| Q9XTA3 | 0.03% | 0.00% | 0.00% | 0.00% |
| Q0P5A6 | 0.03% | 0.03% | 0.02% | 0.00% |
| Q7RTS7 | 0.02% | 0.07% | 0.08% | 0.08% |
| Q3MHL7 | 0.02% | 0.05% | 0.00% | 0.00% |
| Q28085 | 0.02% | 0.04% | 0.01% | 0.01% |
| Q32L40 | 0.02% | 0.06% | 0.02% | 0.06% |
| Q56JV6 | 0.02% | 0.00% | 0.00% | 0.00% |
| A6QP36 | 0.02% | 0.00% | 0.00% | 0.00% |
| G3N3E4 | 0.02% | 0.02% | 0.02% | 0.01% |
| E1BEL6 | 0.02% | 0.02% | 0.02% | 0.01% |
| Q28146 | 0.02% | 0.02% | 0.02% | 0.00% |
| F1ME65 | 0.02% | 0.02% | 0.00% | 0.02% |
| P23206 | 0.02% | 0.02% | 0.00% | 0.00% |
| F1N049 | 0.02% | 0.00% | 0.00% | 0.00% |
| Q2TBL2 | 0.02% | 0.00% | 0.00% | 0.00% |
| Q32PI4 | 0.02% | 0.04% | 0.03% | 0.02% |
| F1MBQ8 | 0.02% | 0.02% | 0.03% | 0.04% |
| G3MYZ3 | 0.02% | 0.04% | 0.03% | 0.02% |
| Q3T0L2 | 0.02% | 0.02% | 0.03% | 0.00% |
| E1BBY7 | 0.02% | 0.06% | 0.02% | 0.02% |
| E1BB32 | 0.02% | 0.02% | 0.02% | 0.00% |
| Q2TBQ1 | 0.02% | 0.05% | 0.02% | 0.00% |
| E1BJ49 | 0.02% | 0.00% | 0.02% | 0.00% |
| E1BGX1 | 0.02% | 0.03% | 0.03% | 0.00% |
| Q2TBU9 | 0.02% | 0.03% | 0.00% | 0.04% |
| Q32LC7 | 0.02% | 0.02% | 0.00% | 0.00% |
| P80227 | 0.02% | 0.00% | 0.01% | 0.02% |
| Q2KJ42 | 0.02% | 0.00% | 0.00% | 0.00% |
| A5PJN2 | 0.02% | 0.03% | 0.00% | 0.04% |
| Q28182 | 0.02% | 0.00% | 0.00% | 0.00% |
| F1N0K0 | 0.02% | 0.01% | 0.01% | 0.00% |
| F1MTT6 | 0.02% | 0.00% | 0.00% | 0.00% |
| Q3ZBD7 | 0.02% | 0.00% | 0.00% | 0.00% |
| F1MDC2 | 0.01% | 0.02% | 0.00% | 0.00% |
| A7E3Q8 | 0.01% | 0.01% | 0.00% | 0.00% |
| Q28141 | 0.01% | 0.02% | 0.02% | 0.02% |
| A0JN39 | 0.01% | 0.01% | 0.00% | 0.00% |

---

---

|            |       |       |       |       |
|------------|-------|-------|-------|-------|
| Q8HXV0     | 0.01% | 0.01% | 0.02% | 0.01% |
| E1BKX7     | 0.01% | 0.01% | 0.01% | 0.01% |
| E1BIG6     | 0.01% | 0.01% | 0.00% | 0.02% |
| Q3ZBV8     | 0.01% | 0.00% | 0.00% | 0.00% |
| A6QNM2     | 0.01% | 0.00% | 0.01% | 0.02% |
| A7MB83     | 0.01% | 0.02% | 0.00% | 0.00% |
| F1MPK6     | 0.01% | 0.00% | 0.01% | 0.00% |
| G3MYM8     | 0.01% | 0.01% | 0.02% | 0.00% |
| F1MC48     | 0.01% | 0.01% | 0.00% | 0.00% |
| Q5D862     | 0.01% | 0.02% | 0.02% | 0.03% |
| F1MYC9     | 0.01% | 0.01% | 0.00% | 0.00% |
| E1BMC4     | 0.01% | 0.01% | 0.01% | 0.01% |
| A0A140T856 | 0.01% | 0.01% | 0.00% | 0.00% |
| E1BGJ0     | 0.01% | 0.00% | 0.01% | 0.00% |
| G5E5W1     | 0.01% | 0.01% | 0.01% | 0.00% |
| E1BFB0     | 0.01% | 0.00% | 0.00% | 0.00% |
| A0A077KSH2 | 0.00% | 0.16% | 0.17% | 0.20% |
| E2DI12     | 0.00% | 0.09% | 0.00% | 0.00% |
| Q24JY8     | 0.00% | 0.12% | 0.09% | 0.05% |
| P00171     | 0.00% | 0.07% | 0.00% | 0.00% |
| Q0P5D6     | 0.00% | 0.06% | 0.05% | 0.00% |
| E1BKS1     | 0.00% | 0.05% | 0.00% | 0.00% |
| Q2KIT0     | 0.00% | 0.10% | 0.00% | 0.00% |
| G3X8D7     | 0.00% | 0.00% | 0.05% | 0.00% |
| F1MKY3     | 0.00% | 0.03% | 0.04% | 0.02% |
| P27674     | 0.00% | 0.04% | 0.00% | 0.04% |
| Q8SPJ1     | 0.00% | 0.04% | 0.04% | 0.04% |
| E1BN90     | 0.00% | 0.00% | 0.00% | 0.01% |
| E1BLQ2     | 0.00% | 0.00% | 0.02% | 0.00% |
| P12378     | 0.00% | 0.03% | 0.00% | 0.00% |
| Q3SYU8     | 0.00% | 0.05% | 0.00% | 0.00% |
| Q3SZ87     | 0.00% | 0.07% | 0.00% | 0.00% |
| G8JKZ8     | 0.00% | 0.15% | 0.11% | 0.00% |
| A7E355     | 0.00% | 0.03% | 0.02% | 0.00% |
| Q0QF04     | 0.00% | 0.03% | 0.00% | 0.00% |
| E1BMM6     | 0.00% | 0.02% | 0.00% | 0.00% |
| Q862J9     | 0.00% | 0.10% | 0.06% | 0.06% |
| G3N2L2     | 0.00% | 0.04% | 0.04% | 0.07% |
| Q9N1X8     | 0.00% | 0.10% | 0.00% | 0.00% |
| Q2NKS8     | 0.00% | 0.09% | 0.00% | 0.00% |
| Q58CQ9     | 0.00% | 0.02% | 0.00% | 0.00% |
| Q1JQA6     | 0.00% | 0.03% | 0.00% | 0.00% |
| A4IFF6     | 0.00% | 0.00% | 0.02% | 0.04% |
| Q5E9A1     | 0.00% | 0.07% | 0.00% | 0.06% |

---

|        |       |       |       |       |
|--------|-------|-------|-------|-------|
| Q3B7M5 | 0.00% | 0.05% | 0.00% | 0.00% |
| Q2HJH4 | 0.00% | 0.04% | 0.00% | 0.00% |
| Q28024 | 0.00% | 0.20% | 0.00% | 0.00% |
| Q7M3G9 | 0.00% | 0.35% | 0.00% | 0.00% |
| D5MTL9 | 0.00% | 0.11% | 0.00% | 0.00% |
| Q3ZCE2 | 0.00% | 0.03% | 0.00% | 0.00% |
| E1BKT9 | 0.00% | 0.00% | 0.00% | 0.01% |
| P02453 | 0.00% | 0.01% | 0.00% | 0.00% |
| Q29RK1 | 0.00% | 0.03% | 0.00% | 0.00% |
| P13135 | 0.00% | 0.00% | 0.04% | 0.00% |
| FIN1C9 | 0.00% | 0.00% | 0.01% | 0.01% |
| Q3ZBE1 | 0.00% | 0.03% | 0.00% | 0.00% |
| Q148J6 | 0.00% | 0.08% | 0.00% | 0.00% |
| Q56JX6 | 0.00% | 0.13% | 0.00% | 0.00% |
| Q2KHT7 | 0.00% | 0.11% | 0.00% | 0.14% |
| Q3T0F4 | 0.00% | 0.08% | 0.06% | 0.00% |

Table S5: Total absorption protein on the surface of stPEI-SPIO / siRNA nanocomplex with or without magnetic fields in two cell lines

| Sample  | OD    | C( $\mu\text{g}/\mu\text{L}$ ) | V( $\mu\text{L}$ ) | m( $\mu\text{g}$ ) |
|---------|-------|--------------------------------|--------------------|--------------------|
| 3T3-1   | 0.302 | 2.78                           | 50.2               | 139.72             |
| 3T3-1MF | 0.131 | 1.25                           | 58.0               | 72.65              |
| 3T3-4   | 0.491 | 4.48                           | 46.5               | 208.10             |
| 3T3-4MF | 0.157 | 1.49                           | 48.5               | 72.04              |
| M-1     | 0.149 | 1.41                           | 40.0               | 56.55              |
| M-1MF   | 0.245 | 2.27                           | 48.8               | 110.93             |
| M-4     | 0.412 | 3.77                           | 47.3               | 178.23             |
| M-4MF   | 0.199 | 1.86                           | 48.7               | 90.64              |
